# Supplementary material
Source: Royal Society of Chemistry journal article supplement (doi:10.1039/d6cc02464e)
Supplement: d6cc02464e1.pdf [file d6cc02464e1.pdf]

## Supporting Information

### Visible-light-driven hydrolytic oxidation of organosilanes to silanols with FeCl<sub>3</sub> as dual functional catalyst

Qingle Xu,<sup>ac</sup> Kaikai Qiao<sup>a</sup>, Wenfeng Jiang,<sup>a</sup> Fei Li<sup>\*c</sup> and Lei Shi<sup>\*ab</sup>

<sup>[a]</sup>School of Chemistry, Dalian University of Technology, Dalian, 116024, P. R. China.

<sup>[b]</sup>State Key Laboratory of Natural Product Chemistry, Lanzhou University, Lanzhou 730000, P. R. China.

<sup>[c]</sup>State Key Laboratory of Fine Chemicals, Frontier Science Center for Smart Materials, Dalian University of Technology, Dalian 116024, China

*E-mail: lifei@dlut.edu.cn*  
*E-mail: shileichem@dlut.edu.cn*

# Table of Contents

|    |                                                                                                   |    |
|----|---------------------------------------------------------------------------------------------------|----|
| 1  |                                                                                                   |    |
| 2  |                                                                                                   |    |
| 3  | 1 General information: .....                                                                      | 3  |
| 4  | 2 Experimental procedures.....                                                                    | 3  |
| 5  | 2.1 Table S1. Optimization of Reaction Conditions .....                                           | 3  |
| 6  | 2.2 Mechanism study .....                                                                         | 4  |
| 7  | 2.2.1 Radical trapping experiment: .....                                                          | 4  |
| 8  | 2.2.2 The Light/Dark Experiments.....                                                             | 5  |
| 9  | 2.2.3 Silicon Cation Capture Experiment .....                                                     | 6  |
| 10 | 2.2.4 Parallel kinetic isotope effect experiment: .....                                           | 7  |
| 11 | 2.2.5 Reaction with H <sub>2</sub> <sup>18</sup> O: .....                                         | 8  |
| 12 | 2.2.6 Control Experiment for the Possible Formation of DMDO:.....                                 | 8  |
| 13 | 2.3 Synthesis of substrates .....                                                                 | 9  |
| 14 | 2.4 General procedure for the dehydrogenative coupling of H <sub>2</sub> O and Organosilanes..... | 9  |
| 15 | 3 References: .....                                                                               | 15 |
| 16 | 4 Copies of NMR for the Compounds .....                                                           | 16 |
| 17 |                                                                                                   |    |

## 1 General information:

The solvents, reagents, and deuterated solvents were purchased from Energy, Aladdin, Adamas, Innochem and Sigma-Aldrich without further purification unless otherwise noted. Chemical shifts were denoted in ppm on the  $\delta$  scale relative to residual solvent peaks as an internal standard:  $\text{CDCl}_3$  ( $\delta$  7.28 for  $^1\text{H}$  NMR),  $\text{CDCl}_3$  ( $\delta$  77.0 for  $^{13}\text{C}$  NMR),  $\text{DMSO-}d_6$  ( $\delta$  2.50 for  $^1\text{H}$  NMR),  $\text{DMSO-}d_6$  ( $\delta$  39.5 for  $^{13}\text{C}$  NMR). Signal patterns are indicated as s, singlet; d, doublet; t, triplet; m, multiplet; br, broaden peak. High resolution mass spectra (HRMS) were obtained from Analysis and Testing Center of Dalian University of Technology on Thermo Fisher Scientific Q Exactive Plus instrument. The material of the photoreaction vessels is regular borosilicate glass. Flash column chromatography was performed on silica gel (200-300 mesh). 10W blue light source from 390 nm LED. The melting points of solid substances were measured using an X-4 Precision Microscopic Melting Point Tester.

13

14

15

## 16 2 Experimental procedures

### 17 2.1 Table S1. Optimization of Reaction Conditions

18

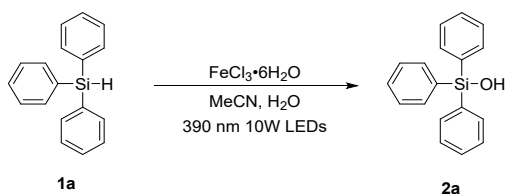

| Entry | Catalyst                                                    | Solvent                  | $\text{H}_2\text{O}$               | Yield <sup>b</sup> |
|-------|-------------------------------------------------------------|--------------------------|------------------------------------|--------------------|
| 1     | $\text{FeCl}_2$                                             | MeCN                     | 200 $\mu\text{L}$                  | 96%                |
| 2     | $\text{CeCl}_3$                                             | MeCN                     | 200 $\mu\text{L}$                  | 90%                |
| 3     | <b><math>\text{FeCl}_3 \cdot 6\text{H}_2\text{O}</math></b> | <b>MeCN</b>              | <b>200<math>\mu\text{L}</math></b> | <b>98%</b>         |
| 4     | $\text{Fe}(\text{NO}_3)_3 \cdot 9\text{H}_2\text{O}$        | MeCN                     | 200 $\mu\text{L}$                  | 60%                |
| 5     | $\text{FeSO}_4 \cdot 7\text{H}_2\text{O}$                   | MeCN                     | 200 $\mu\text{L}$                  | trace              |
| 6     | NaCl                                                        | MeCN                     | 200 $\mu\text{L}$                  | trace              |
| 7     | LiCl                                                        | MeCN                     | 200 $\mu\text{L}$                  | trace              |
| 8     | <b><math>\text{FeCl}_3 \cdot 6\text{H}_2\text{O}</math></b> | <b>Acetone</b>           | <b>200<math>\mu\text{L}</math></b> | <b>98%</b>         |
| 9     | $\text{FeCl}_3 \cdot 6\text{H}_2\text{O}$                   | $\text{CH}_3\text{NO}_2$ | 200 $\mu\text{L}$                  | 90%                |
| 10    | $\text{FeCl}_3 \cdot 6\text{H}_2\text{O}$                   | AcOEt                    | 200 $\mu\text{L}$                  | 72%                |
| 11    | $\text{FeCl}_3 \cdot 6\text{H}_2\text{O}$                   | $\text{CH}_3\text{OH}$   | 200 $\mu\text{L}$                  | 31%                |
| 12    | $\text{FeCl}_3 \cdot 6\text{H}_2\text{O}$                   | DMSO                     | 200 $\mu\text{L}$                  | trace              |
| 13    | $\text{FeCl}_3 \cdot 6\text{H}_2\text{O}$                   | THF                      | 200 $\mu\text{L}$                  | trace              |



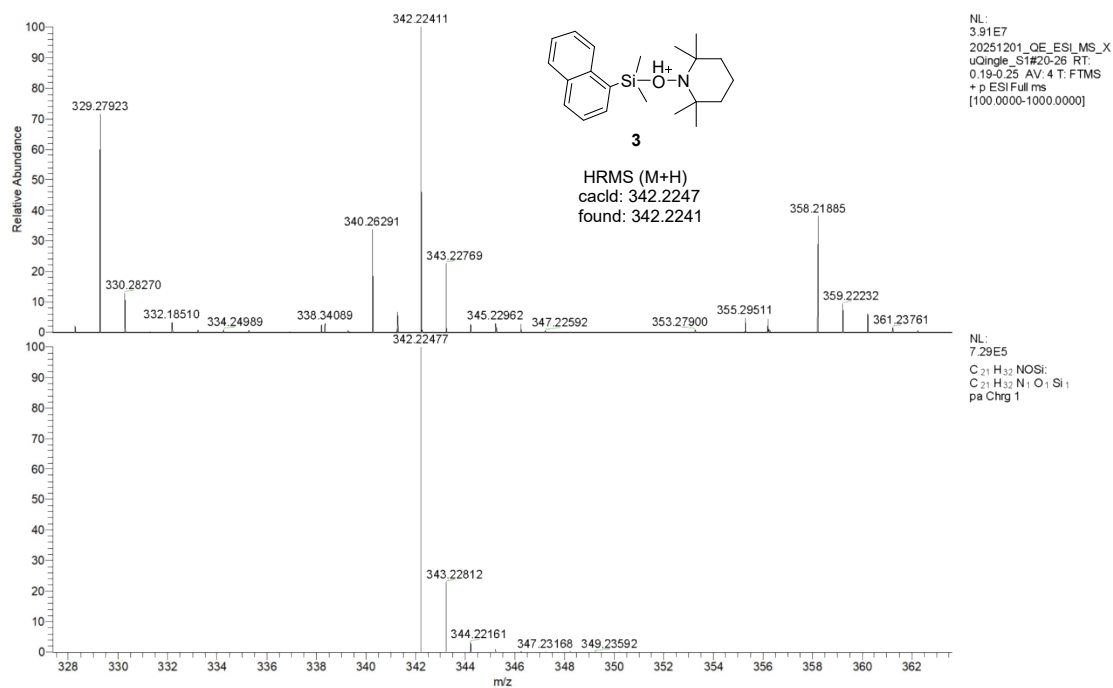

1  
2

**Figure S1.** High-resolution mass spectrometry (HRMS) of **3**

### 3 2.2.2 The Light/Dark Experiments

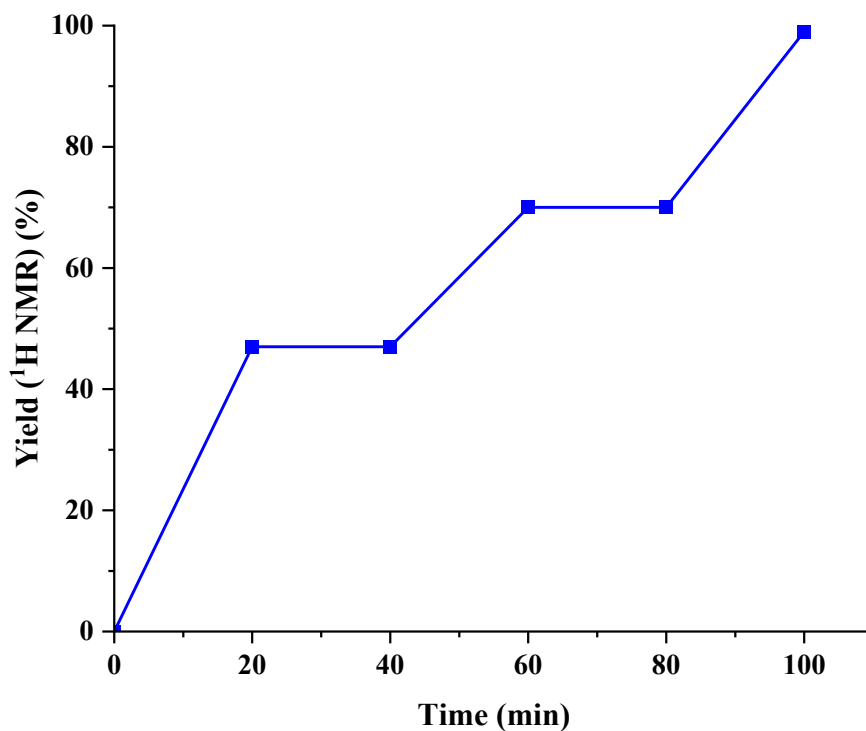

4  
5

**Figure S2.** The Light/Dark Experiments of **2a**

6 In a 10 mL glass reaction vessel, substrate **1a** (0.4 mmol, 1.0 equiv),  $\text{FeCl}_3 \cdot 6\text{H}_2\text{O}$  (0.01 equiv),  
 7 and  $\text{H}_2\text{O}$  (20  $\mu\text{L}$ ) were successively added. Then, acetone (4 mL) was added to dissolve the substrate.  
 8 The resulting mixture was irradiated at room temperature with a 10 W, 390 nm blue LED for 60

1 minutes. After the reaction, the light source was removed, and the reaction vial was completely  
2 wrapped in aluminum foil to shield from light during the subsequent time points as shown in Figure  
3 S2. At each specified time point, a 0.5 mL aliquot was taken. The solvent was removed under  
4 reduced pressure to obtain the crude product. The residue was diluted with CDCl<sub>3</sub> and analyzed by  
5 <sup>1</sup>H NMR spectroscopy using 1,3,5-trimethoxybenzene as the internal standard.

### 6 2.2.3 Silicon Cation Capture Experiment

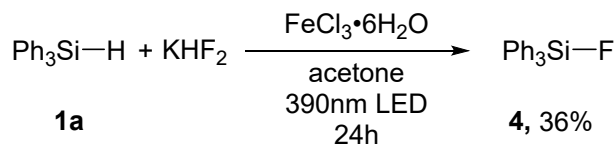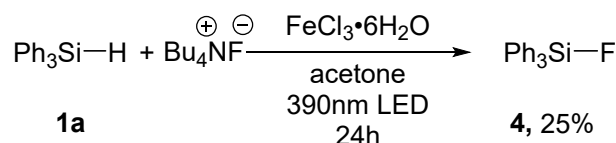

7

8 In two separate 5 mL glass vials, substrate **1a** (0.2 mmol, 1.0 equiv) and FeCl<sub>3</sub>·6H<sub>2</sub>O (0.01  
9 equiv) were combined. To the first vial, KHF<sub>2</sub> (0.8 mmol, 4.0 equiv) was added, followed by acetone  
10 (2 mL) to dissolve the mixture. To the second vial, tetrabutylammonium fluoride (TBAF, 0.8 mmol,  
11 4.0 equiv) was added, also followed by acetone (2 mL). The resulting mixtures in both vials were  
12 then irradiated at room temperature with a 10 W, 390 nm LED for 24 hours. After purification by  
13 column chromatography, the fluorosilane product was isolated in yields of 36% and 25%,  
14 respectively (see Figures S2 and S3). These results further confirm the photoinduced generation of  
15 a silyl cation intermediate.

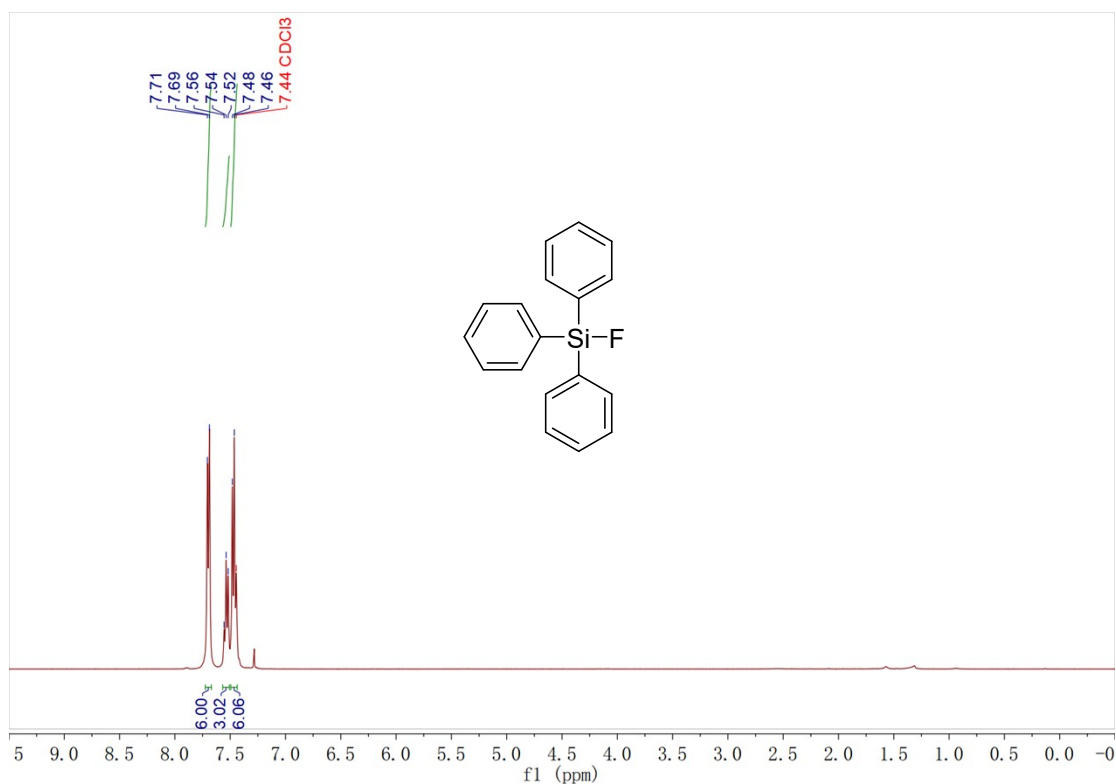

1  $^1\text{H}$  NMR (400 MHz, Chloroform-*d*)  $\delta$  7.70 (d,  $J = 7.3$  Hz, 6H), 7.54 (t,  $J = 7.3$  Hz, 3H), 7.47 (d,  $J = 7.3$   
2 Hz, 6H).

3

**Figure S3.**  $^1\text{H}$  NMR (400 MHz,  $\text{CDCl}_3$ ) of **4**

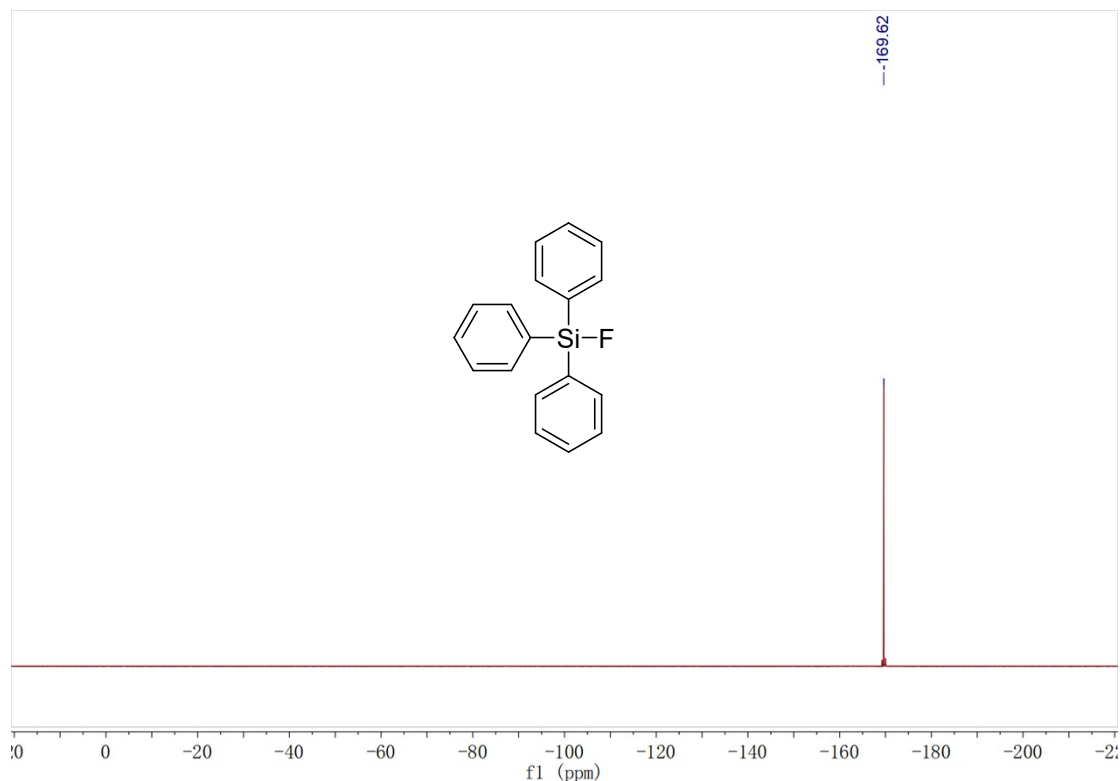

5  $^{19}\text{F}$  NMR (377 MHz, Chloroform-*d*)  $\delta$  -169.6.

6

**Figure S4.**  $^{19}\text{F}$  NMR (377 MHz,  $\text{CDCl}_3$ ) of **4**

#### 7 2.2.4 Parallel kinetic isotope effect experiment:

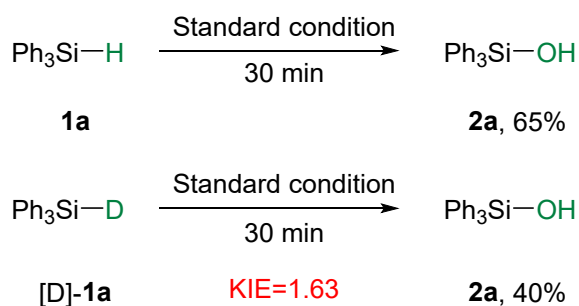

8

9 Two parallel reactions were conducted. In the first, substrate **1a** (0.2 mmol, 1.0 equiv),  
10  $\text{FeCl}_3 \cdot 6\text{H}_2\text{O}$  (0.01 equiv), and  $\text{H}_2\text{O}$  (10  $\mu\text{L}$ ) were placed in a 5 mL glass vial and dissolved in acetone  
11 (2 mL). In the second, deuterated substrate **[D]-1a** (0.2 mmol, 1.0 equiv),  $\text{FeCl}_3 \cdot 6\text{H}_2\text{O}$  (0.01 equiv),  
12 and  $\text{H}_2\text{O}$  (10  $\mu\text{L}$ ) were added to a separate 5 mL vial and likewise dissolved in acetone (2 mL). Both  
13 mixtures were irradiated simultaneously at room temperature using a 10 W, 390 nm LED for 30 min.  
14 After completion, each reaction mixture was purified by flash silica column chromatography  
15 (eluent: petroleum ether/ethyl acetate = 15:1), affording the corresponding products in 65% and 40%  
16 yield, respectively. The product ratio was determined to be 1.63:1, giving a kinetic isotope effect  
17  $k_{\text{H}}/k_{\text{D}} = 1.63$ . This result indicates that cleavage of the Si-H bond is involved in the  
18 rate-determining step of the reaction.

## 1 2.2.5 Reaction with H<sub>2</sub><sup>18</sup>O:

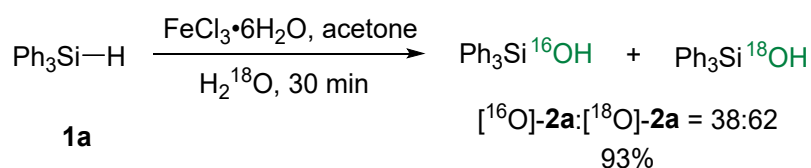

2

3 In a 5 mL glass reaction vial, substrate **1a** (0.2 mmol, 1.0 equiv), FeCl<sub>3</sub>·6H<sub>2</sub>O (0.01 equiv), and  
4 H<sub>2</sub><sup>18</sup>O (10 μL) were added successively. Acetone (2 mL) was then added to dissolve the mixture.  
5 The resulting solution was irradiated at room temperature for 30 minutes using a 10 W, 390 nm blue  
6 LED. After then, the solvent was removed under reduced pressure, and the residue was purified by  
7 flash silica column chromatography (petroleum ether/ethyl acetate = 15:1) to afford product **2a** (52  
8 mg, 93% yield). High-resolution mass spectrometry (ESI-HRMS) of **2a** (Figure S5) revealed that  
9 the product consisted of 38% [<sup>16</sup>O]-**2a** and 62% [<sup>18</sup>O]-**2a**. Combined with the previous control  
10 experiment, in which the reaction did not proceed under a nitrogen atmosphere, these results indicate  
11 that the oxygen in the product originates not only from the added water but also from atmospheric  
12 oxygen.

13

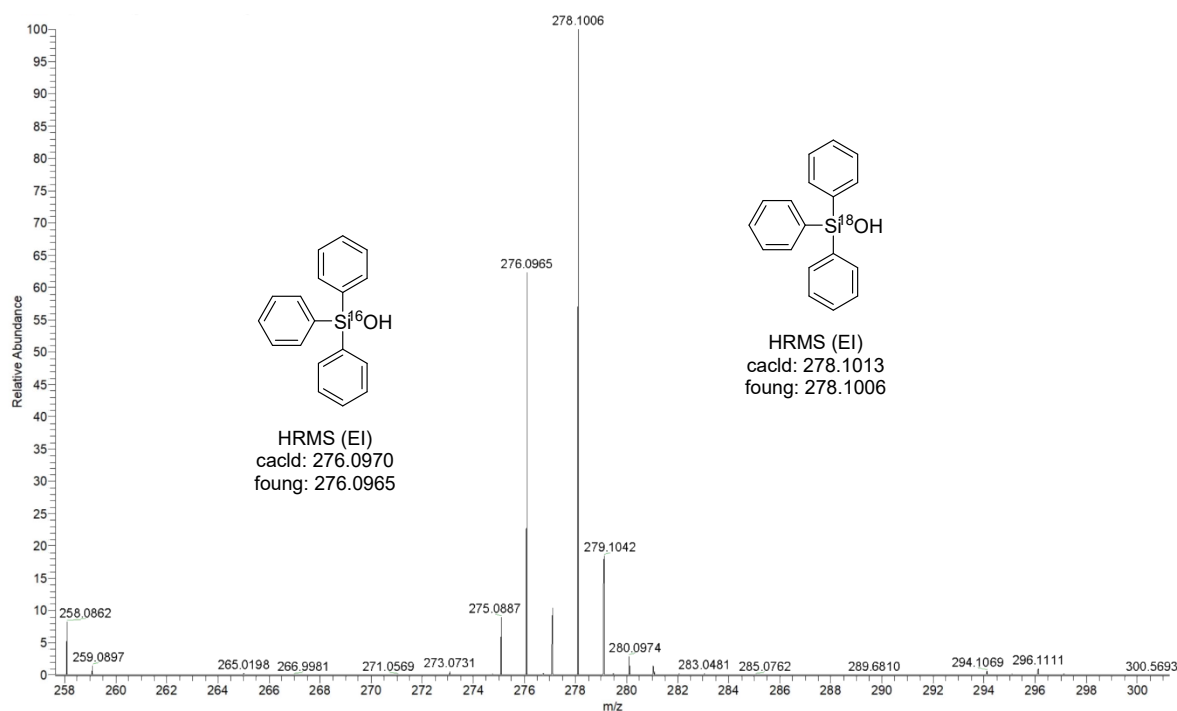

14

15 **Figure S5.** High-resolution mass spectrometry (HRMS) of [<sup>16</sup>O]-**2a** and [<sup>18</sup>O]-**2a**

16

## 17 2.2.6 Control Experiment for the Possible Formation of DMDO:

18 In a 5 mL glass reaction vial, FeCl<sub>3</sub>·6H<sub>2</sub>O (0.01 equiv) was added, followed by acetone (2 mL)  
19 and H<sub>2</sub>O (10 μL). The mixture was stirred at room temperature for 30 minutes under air with  
20 irradiation using a 10 W, 390 nm blue LED (no silane substrate added). A piece of KI-starch test  
21 paper was then dipped into the reaction mixture. No color change was observed, indicating the  
22 absence of detectable peroxides (including DMDO). This result confirms that DMDO is not formed  
23 under our reaction conditions.

1

2 **2.3 Synthesis of substrates**

3

4 1) General procedure for the preparation of starting materials of **1a-1o**, **1u**, **1v**.<sup>[1]</sup>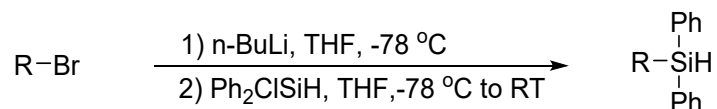

5

6 In a 100 mL round-bottom flask, aryl bromide (5.0 mmol, 1.0 equiv) in THF (10 mL) was  
7 cooled to -78 °C. *n*-BuLi (3.2 mL, 1.6 M in THF, 6.0 mmol, 1.2 equiv) was added dropwise slowly  
8 over 30 min. The resulting mixture was stirred at -78 °C for 2 h before the dropwise addition of  
9 chlorodiphenylsilane (6.0 mmol, 1.2 equiv). The reaction was allowed to warm to room temperature  
10 and stirred for 8 h. The reaction mixture was quenched with NH<sub>4</sub>Cl (15 mL, saturated aqueous  
11 solution) and the mixture was extracted with Et<sub>2</sub>O (3x15 mL). The combined organic layer was  
12 washed with water (20 mL), brine (20 mL), dried over anhydrous Na<sub>2</sub>SO<sub>4</sub>, and then concentrated  
13 under reduced pressure. The residue was purified by flash silica gel column chromatography to  
14 afford the hydrosilane.

15 2) General procedure for the preparation of starting materials of **2aa**, **2ab**, **2ac**.<sup>[1]</sup>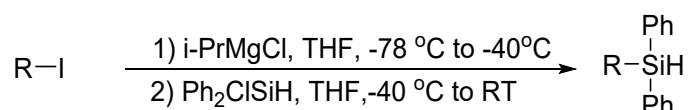

16

17 In a 100 mL round-bottom flask, aryl iodide (5.0 mmol, 1.0 equiv) in THF (10 mL) was cooled  
18 to -78 °C. *i*-PrMgCl (3 mL, 2.0 M in THF, 6.0 mmol, 1.2 equiv) was added dropwise slowly over  
19 15 min. The resulting mixture was allowed to warm to -40 °C in 2 h and maintained at -40 °C for  
20 another 2 h before the dropwise addition of chlorodiphenylsilane (6.0 mmol, 1.2 equiv). The  
21 reaction was allowed to warm to room temperature and stirred for 8 h. The reaction mixture was  
22 quenched with NH<sub>4</sub>Cl (15 mL, saturated aqueous solution) and the mixture was extracted with  
23 CH<sub>2</sub>Cl<sub>2</sub> (3x15 mL). The combined organic layer was washed with water (20 mL), brine (20 mL),  
24 dried over anhydrous Na<sub>2</sub>SO<sub>4</sub>, and then concentrated under reduced pressure. The residue was  
25 purified by flash silica gel column chromatography to afford the hydrosilane.

26 **2.4 General procedure for the dehydrogenative coupling of H<sub>2</sub>O and**  
27 **Organosilanes**

28

29 **Triphenylsilanol (2a)** was purified by flash column chromatography on silica gel (petroleum  
30 ether/ethyl acetate = 10:1). 54 mg, 98% yield, colorless oil, known compound<sup>1</sup>. <sup>1</sup>H  
31 NMR (500 MHz, Chloroform-*d*) δ 7.68 (dt, *J* = 6.7, 1.5 Hz, 6H), 7.52 – 7.47 (m, 3H),  
32 7.46 – 7.40 (m, 6H), 2.95 (s, 1H). <sup>13</sup>C NMR (126 MHz, Chloroform-*d*) δ 135.2, 135.0,  
33 130.2, 128.0.

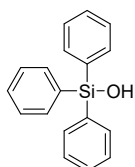

34

35

36

1 **Diphenyl(*p*-tolyl)silanol (2b)** was purified by flash column chromatography on silica  
2 (petroleum ether/ethyl acetate = 10:1). 44 mg, 76% yield, pale yellow oil, known  
3 compound<sup>1</sup>. <sup>1</sup>H NMR (400 MHz, Chloroform-*d*) δ 7.72 – 7.63 (m, 4H), 7.59 – 7.52  
4 (m, 2H), 7.51 – 7.38 (m, 6H), 7.25 (d, *J* = 7.5 Hz, 2H), 2.66 (s, 1H), 2.41 (d, *J* = 1.7  
5 Hz, 3H). <sup>13</sup>C NMR (101 MHz, Chloroform-*d*) δ 140.2, 135.4, 135.1, 135.0, 131.5,  
6 130.1, 128.8, 127.9, 21.7.

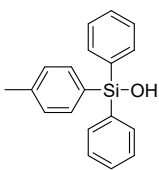

8 **(2-methoxyphenyl)diphenylsilanol (2c)** was purified by flash column chromatography on silica  
9 gel (petroleum ether/ethyl acetate = 10:1). 53 mg, 87% yield, pale yellow oil,  
10 known compound<sup>7</sup>. <sup>1</sup>H NMR (500 MHz, Chloroform-*d*) δ 7.66 – 7.61 (m, 4H),  
11 7.48 – 7.37 (m, 7H), 7.25 (s, 1H), 7.01 – 6.93 (m, 2H), 3.77 (s, 3H), 3.17 (s, 1H). <sup>13</sup>C  
12 NMR (126 MHz, Chloroform-*d*) δ 164.4, 136.9, 135.6, 135.1, 132.0, 129.9, 127.8,  
13 123.3, 121.0, 110.1, 55.4.

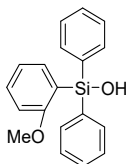

15 **(3-methoxyphenyl)diphenylsilanol (2d)** was purified by flash column chromatography on silica  
16 gel (petroleum ether/ethyl acetate = 10:1). 47 mg, 77% yield, pale yellow oil,  
17 known compound<sup>2</sup>. <sup>1</sup>H NMR (400 MHz, Chloroform-*d*) δ 7.71 – 7.61 (m, 4H),  
18 7.50 – 7.36 (m, 7H), 7.28 – 7.19 (m, 2H), 7.01 (dd, *J* = 8.3, 2.7 Hz, 1H), 3.80 (s,  
19 3H), 2.83 (s, 1H). <sup>13</sup>C NMR (101 MHz, Chloroform-*d*) δ 159.0, 136.7, 135.0,  
20 135.0, 130.2, 129.3, 128.0, 127.4, 120.2, 115.7, 55.2.

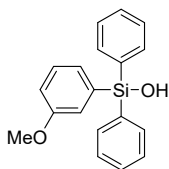

22 **(4-methoxyphenyl)diphenylsilanol (2e)** was purified by flash column chromatography on silica  
23 gel (petroleum ether/ethyl acetate = 10:1). 51 mg, 84% yield, pale yellow oil,  
24 known compound<sup>1</sup>. <sup>1</sup>H NMR (500 MHz, Chloroform-*d*) δ 7.68 – 7.63 (m, 4H),  
25 7.60 – 7.55 (m, 2H), 7.50 – 7.38 (m, 6H), 6.99 – 6.94 (m, 2H), 3.85 (s, 3H), 2.49  
26 (s, 1H). <sup>13</sup>C NMR (101 MHz, Chloroform-*d*) δ 161.3, 136.7, 135.5, 135.0, 130.1,  
27 128.0, 126.1, 113.7, 55.1.

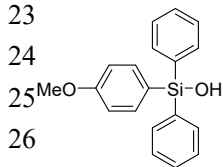

29 **(4-(tert-butyl)phenyl)diphenylsilanol (2f)** was purified by flash column chromatography on silica  
30 gel (petroleum ether/ethyl acetate = 10:1). 59 mg, 88% yield, colorless oil, known  
31 compound<sup>1</sup>. <sup>1</sup>H NMR (400 MHz, Chloroform-*d*) δ 7.71 – 7.66 (m, 4H), 7.63 – 7.58  
32 (m, 2H), 7.48 – 7.39 (m, 8H), 2.65 (s, 1H), 1.36 (s, 9H). <sup>13</sup>C NMR (101 MHz,  
33 Chloroform-*d*) δ 153.2, 135.4, 135.0, 135.0, 131.6, 130.0, 128.0, 125.0, 34.8, 31.2.

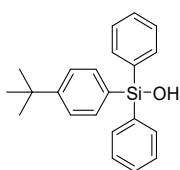

35 **[1,1'-biphenyl]-4-ylidiphenylsilanol (2g)** was purified by flash column chromatography on silica  
36 gel (petroleum ether/ethyl acetate = 10:1). 68 mg, 97% yield, white solid, mp: 104-  
37 106 °C, known compound<sup>1</sup>. <sup>1</sup>H NMR (400 MHz, Chloroform-*d*) δ 7.76 – 7.69 (m,  
38 6H), 7.67 – 7.62 (m, 4H), 7.52 – 7.37 (m, 9H), 2.83 (s, 1H). <sup>13</sup>C NMR (101 MHz,  
39 Chloroform-*d*) δ 142.8, 140.9, 135.6, 135.2, 135.1, 133.9, 130.2, 128.9, 128.0,  
40 127.7, 127.3, 126.7.

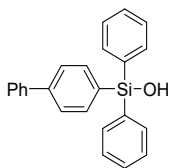

42 **(4-phenoxyphenyl)diphenylsilanol (2h)** was purified by flash column chromatography on silica

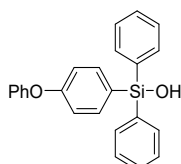

1 gel (petroleum ether/ethyl acetate = 10:1). 72 mg, 99% yield, colorless oil, known compound<sup>3</sup>. <sup>1</sup>H  
2 NMR (400 MHz, Chloroform-*d*) δ 7.71 – 7.63 (m, 4H), 7.64 – 7.58 (m, 2H), 7.51 – 7.36 (m, 8H),  
3 7.17 (t, *J* = 7.4 Hz, 1H), 7.13 – 6.99 (m, 4H), 2.79 (s, 1H). <sup>13</sup>C NMR (101 MHz, Chloroform-*d*) δ  
4 159.4, 156.4, 136.8, 135.2, 135.0, 130.2, 129.9, 129.0, 128.0, 123.8, 119.6, 117.9.

5

6 **(4-fluorophenyl)diphenylsilanol (2i)** was purified by flash column chromatography on silica gel  
7 (petroleum ether/ethyl acetate = 10:1). 54 mg, 92% yield, white solid, mp: 117-

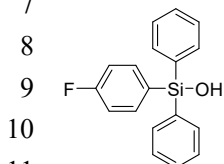

8 119 °C, known compound<sup>4</sup>. <sup>1</sup>H NMR (400 MHz, Chloroform-*d*) δ 7.66 – 7.60 (m,  
9 6H), 7.51 – 7.46 (m, 2H), 7.42 (dd, *J* = 7.9, 6.5 Hz, 4H), 7.13 – 7.07 (m, 2H), 2.66  
10 (s, 1H). <sup>13</sup>C NMR (101 MHz, Chloroform-*d*) δ 165.6, 163.1, 137.2, 137.1, 135.0,  
11 134.9, 130.8, 130.3, 128.0, 115.3, 115.1. <sup>19</sup>F NMR (377 MHz, Chloroform-*d*) δ -  
12 110.00.

13

14 **diphenyl(4-(trifluoromethyl)phenyl)silanol (2j)** was purified by flash column chromatography on  
15 silica gel (petroleum ether/ethyl acetate = 10:1). 57 mg, 83% yield, pale yellow oil,  
16 known compound<sup>1</sup>. <sup>1</sup>H NMR (400 MHz, Chloroform-*d*) δ 7.77 (d, *J* = 7.8 Hz, 2H),

17 7.67 – 7.59 (m, 6H), 7.53 – 7.47 (m, 2H), 7.46 – 7.39 (m, 4H), 3.07 (s, 1H). <sup>13</sup>C  
18 NMR (101 MHz, Chloroform-*d*) δ 140.1, 135.34, 135.31, 135.0, 134.98, 134.2,  
19 130.6, 130.5, 128.18, 128.15, 124.52. <sup>19</sup>F NMR (377 MHz, Chloroform-*d*) δ -62.9.

20

21 **4-(hydroxydiphenylsilyl)benzonitrile (2k)** was purified by flash column chromatography on silica  
22 gel (petroleum ether/ethyl acetate = 10:1). 48 mg, 80% yield, colorless oil, known  
23 compound<sup>1</sup>. <sup>1</sup>H NMR (400 MHz, Chloroform-*d*) δ 7.78 – 7.74 (m, 2H), 7.66 – 7.59

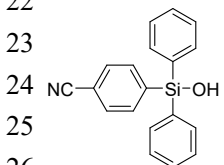

24 (m, 6H), 7.53 – 7.48 (m, 2H), 7.47 – 7.38 (m, 4H), 2.64 (s, 1H). <sup>13</sup>C NMR (101  
25 MHz, Chloroform-*d*) δ 142.1, 135.4, 134.9, 133.8, 131.2, 130.7, 128.2, 118.9,  
26 113.5.

27

28 **naphthalen-1-ylidiphenylsilanol (2l)** was purified by flash column chromatography on silica gel  
29 (petroleum ether/ethyl acetate = 10:1). 48 mg, 74% yield, pale yellow oil, known  
30 compound<sup>1</sup>. <sup>1</sup>H NMR (400 MHz, Chloroform-*d*) δ 8.19 (d, *J* = 8.4 Hz, 1H), 7.99

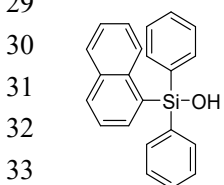

31 (d, *J* = 8.2 Hz, 1H), 7.92 (d, *J* = 8.2 Hz, 1H), 7.75 – 7.64 (m, 5H), 7.49 (m, 4H),  
32 7.45 – 7.38 (m, 5H), 2.89 (s, 1H). <sup>13</sup>C NMR (101 MHz, Chloroform-*d*) δ 137.2,  
33 136.6, 135.7, 135.1, 133.5, 133.0, 131.1, 130.2, 129.0, 128.9, 128.1, 126.2, 125.7,  
34 125.1.

35 **naphthalen-2-ylidiphenylsilanol (2m)** was purified by flash column chromatography on silica gel  
36 (petroleum ether/ethyl acetate = 10:1). 58 mg, 89% yield, white solid, mp: 52-54

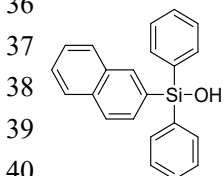

37 °C, known compound<sup>2</sup>. <sup>1</sup>H NMR (400 MHz, Chloroform-*d*) δ 8.19 (s, 1H), 7.91 –  
38 7.83 (m, 3H), 7.71 (m, 5H), 7.59 – 7.42 (m, 8H), 2.79 (s, 1H). <sup>13</sup>C NMR (101 MHz,  
39 Chloroform-*d*) δ 136.4, 135.1, 135.1, 134.3, 132.8, 132.6, 130.6, 130.3, 128.5,  
40 128.1, 127.8, 127.3, 127.0, 126.1.

41 **diphenyl(thiophen-2-yl)silanol (2n)** was purified by flash column chromatography on silica gel  
42 (petroleum ether/ethyl acetate = 10:1). 45 mg, 80% yield, colorless oil, known

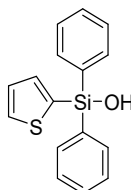

1 compound<sup>1</sup>. <sup>1</sup>H NMR (400 MHz, Chloroform-*d*) δ 7.79 – 7.67 (m, 5H), 7.54 – 7.41 (m, 7H), 7.29 –  
2 7.25 (m, 1H), 2.54 (s, 1H). <sup>13</sup>C NMR (101 MHz, Chloroform-*d*) δ 137.7, 134.9, 134.8, 134.7, 132.6,  
3 130.4, 128.4, 128.0.

4

5 **dibenzo[b,d]furan-4-ylidiphenylsilanol (2o)** was purified by flash column chromatography on  
6 silica gel (petroleum ether/ethyl acetate = 10:1). 72 mg, 99% yield, white solid,  
7 mp: 46-48 °C, known compound<sup>1</sup>. <sup>1</sup>H NMR (500 MHz, Chloroform-*d*) δ 8.08 (dd,  
8  $J = 7.6, 1.4$  Hz, 1H), 8.00 (dd,  $J = 7.6, 1.3$  Hz, 1H), 7.73 (m, 4H), 7.55 – 7.35 (m,  
9 12H), 3.29 (s, 1H). <sup>13</sup>C NMR (101 MHz, Chloroform-*d*) δ 160.9, 155.9, 135.1,  
10 134.7, 134.3, 130.4, 128.0, 127.2, 124.0, 123.2, 122.9, 122.9, 122.8, 120.7, 118.2,  
11 111.9.

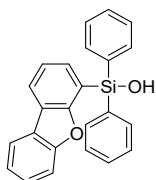

12

13 **diphenyl(phenylethynyl)silanol (2p)** was purified by flash column chromatography on silica gel  
14 (petroleum ether/ethyl acetate = 10:1). 20 mg, 33% yield, colorless oil, known  
15 compound<sup>4</sup>. <sup>1</sup>H NMR (500 MHz, Chloroform-*d*) δ 7.86 (ddd,  $J = 7.9, 3.3, 1.6$  Hz,  
16 3H), 7.62 (dt,  $J = 8.3, 1.6$  Hz, 2H), 7.56 – 7.30 (m, 10H). <sup>13</sup>C NMR (126 MHz,  
17 Chloroform-*d*) δ 134.6, 134.5, 132.4, 130.6, 129.4, 128.4, 128.1, 122.2, 108.0,  
18 89.7.

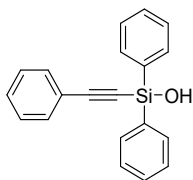

19

20 **cyclohexyldiphenylsilanol (2q)** was purified by flash column chromatography on silica gel  
21 (petroleum ether/ethyl acetate = 10:1). 22 mg, 40% yield, colourless solid, mp:  
22 154-156 °C, known compound<sup>2</sup>. <sup>1</sup>H NMR (500 MHz, Chloroform-*d*) δ 7.70 –  
23 7.62 (m, 4H), 7.49 – 7.38 (m, 6H), 1.90 – 1.83 (m, 2H), 1.77 (ddd,  $J = 7.4, 4.9,$   
24 2.4 Hz, 3H), 1.36 – 1.24 (m, 6H). <sup>13</sup>C NMR (126 MHz, Chloroform-*d*) δ 135.4,  
25 134.6, 129.8, 127.9, 27.9, 26.9, 26.8, 25.5.

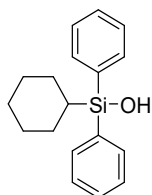

26

27 **octyldiphenylsilanol (2r)** was purified by flash column chromatography on silica gel (petroleum  
28 ether/ethyl acetate = 10:1). 45 mg, 73% yield, colourless oil, known compound<sup>5</sup>.  
29 <sup>1</sup>H NMR (400 MHz, Chloroform-*d*) δ 7.64 (d,  $J = 7.0$  Hz, 4H), 7.48 – 7.34 (m,  
30 6H), 2.46 (h,  $J = 12.3$  Hz, 1H), 1.48 (d,  $J = 7.8$  Hz, 2H), 1.40 – 1.25 (m, 11H),  
31 1.18 (dd,  $J = 10.1, 6.3$  Hz, 2H), 0.91 (t,  $J = 6.9$  Hz, 3H). <sup>13</sup>C NMR (101 MHz,  
32 Chloroform-*d*) δ 136.5, 134.2, 129.9, 127.9, 33.5, 31.9, 29.3, 29.2, 23.0, 22.7,  
33 15.1, 14.2.

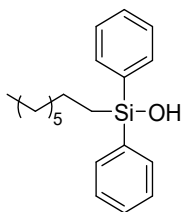

34

35 **methyldiphenylsilanol (2s)** was purified by flash column chromatography on silica gel (petroleum  
36 ether/ethyl acetate = 10:1). 42 mg, 99% yield, colourless oil, known compound<sup>1</sup>.  
37 <sup>1</sup>H NMR (400 MHz, Chloroform-*d*) δ 7.69 – 7.61 (m, 4H), 7.48 – 7.38 (m, 6H),  
38 2.41 (s, 1H), 0.70 (s, 3H). <sup>13</sup>C NMR (101 MHz, Chloroform-*d*) δ 137.1, 134.0,  
39 129.9, 128.0.

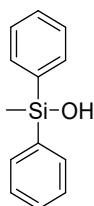

40

41 **[1,1'-biphenyl]-4-yl dimethylsilanol (2t)** was purified by flash column  
42 chromatography on silica gel (petroleum ether/ethyl acetate = 10:1). 34 mg, 75% yield, white solid, mp: 77-79 °C, known

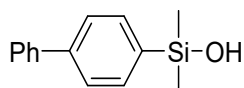

1 compound<sup>6</sup>. <sup>1</sup>H NMR (400 MHz, Chloroform-*d*) δ 7.71 – 7.58 (m, 6H), 7.48 (t, *J* = 7.5 Hz, 2H), 7.39  
2 (t, *J* = 7.5 Hz, 1H), 0.43 (s, 6H). <sup>13</sup>C NMR (126 MHz, Chloroform-*d*) δ 142.0, 141.1, 138.5, 133.6,  
3 128.8, 127.4, 127.2, 126.5, 1.0.

4

5 **dimethyl(phenyl)silanol (2u)** was purified by flash column chromatography on silica gel  
6 (petroleum ether/ethyl acetate = 10:1). 18 mg, 60% yield, colourless oil, known

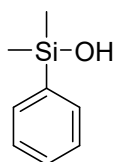

7 compound<sup>4</sup>. <sup>1</sup>H NMR (400 MHz, Chloroform-*d*) δ 7.60 – 7.56 (m, 2H), 7.43 – 7.36  
8 (m, 3H), 0.37 (s, 6H). <sup>13</sup>C NMR (126 MHz, Chloroform-*d*) δ 139.8, 133.0, 129.3,  
9 127.7, 0.9.

10

11 **dimethyl(naphthalen-1-yl)silanol (2v)** was purified by flash column chromatography on silica gel  
12 (petroleum ether/ethyl acetate = 10:1). 29 mg, 73% yield, colourless oil, known

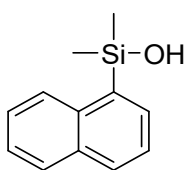

13 compound<sup>4</sup>. <sup>1</sup>H NMR (400 MHz, Chloroform-*d*) δ 8.34 – 8.27 (m, 1H), 7.94 –  
14 7.88 (m, 2H), 7.80 (dd, *J* = 6.8, 1.4 Hz, 1H), 7.58 – 7.48 (m, 3H), 1.99 (s, 1H),  
15 0.61 (s, 6H). <sup>13</sup>C NMR (101 MHz, Chloroform-*d*) δ 136.9, 136.6, 133.4, 133.3,  
16 130.5, 129.1, 128.2, 126.1, 125.6, 125.1, 1.4.

17

18 **Tributylsilanol (2w)** was purified by flash column chromatography on silica gel (petroleum  
19 ether/ethyl acetate = 10:1). 30 mg, 70% yield, colorless oil, known

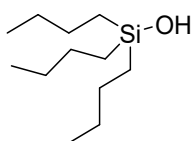

20 compound<sup>1</sup>. <sup>1</sup>H NMR (500 MHz, Chloroform-*d*) δ 1.40 – 1.26 (m, 12H), 0.91  
21 (t, *J* = 6.9 Hz, 9H), 0.64 – 0.43 (m, 6H). <sup>13</sup>C NMR (126 MHz, Chloroform-*d*) δ  
22 26.7, 25.5, 15.5, 13.8.

23

24 **Diphenylsilanediol (2x)** was purified by flash column chromatography on silica gel (petroleum  
25 ether/ethyl acetate = 5:1). 32 mg, 74% yield, white solid, mp: 142-144 °C, known

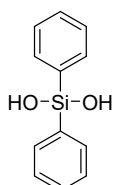

26 compound<sup>1</sup>. <sup>1</sup>H NMR (500 MHz, DMSO-*d*<sub>6</sub>) δ 7.66 – 7.57 (m, 4H), 7.41 – 7.31 (m,  
27 6H), 6.97 (s, 2H). <sup>13</sup>C NMR (126 MHz, DMSO-*d*<sub>6</sub>) δ 138.3, 134.5, 129.8, 127.9.

28

29

30 **1,4-phenylenebis(diphenylsilanol) (2y)** was purified by flash column chromatography on silica gel  
31 (petroleum ether/ethyl acetate = 5:1). 82 mg, 86% yield, white solid, mp: 234-

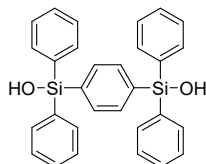

32 236 °C, known compound<sup>1</sup>. <sup>1</sup>H NMR (500 MHz, DMSO-*d*<sub>6</sub>) δ 7.60 (s, 4H),  
33 7.58 – 7.54 (m, 8H), 7.45 – 7.36 (m, 12H), 7.18 (s, 2H). <sup>13</sup>C NMR (126 MHz,  
34 DMSO-*d*<sub>6</sub>) δ 138.6, 136.8, 135.0, 134.2, 130.2, 128.3.

35

36

37

38

39 **(1R,2S,5R)-2-isopropyl-5-methylcyclohexyl 4-(hydroxydiphenylsilyl)benzoate (2aa)** was  
40 purified by flash column chromatography on silica gel (petroleum ether/ethyl

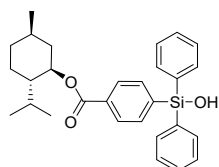

1 acetate = 5:1). 69 mg, 76% yield, colorless oil, known compound<sup>1</sup>. <sup>1</sup>H NMR (400 MHz, Chloroform-  
2 d)  $\delta$  8.08 - 8.01 (m, 2H), 7.79 - 7.72 (m, 2H), 7.64 (dt,  $J$  = 8.0, 1.5 Hz, 4H), 7.51 - 7.38 (m,  
3 6H), 4.97 (td,  $J$  = 10.9, 4.4 Hz, 1H), 3.16 (s, 1H), 2.19 - 2.11 (m, 1H), 1.99 (pd,  $J$  = 6.9, 2.7 Hz,  
4 1H), 1.77 (dq,  $J$  = 14.9, 3.3 Hz, 2H), 1.63 - 1.54 (m, 2H), 1.19 - 1.10 (m, 2H), 0.97 (d,  $J$  = 4.9  
5 Hz, 4H), 0.95 (d,  $J$  = 5.2 Hz, 3H), 0.82 (d,  $J$  = 6.9 Hz, 3H). <sup>13</sup>C NMR (101 MHz, Chloroform-*d*)  $\delta$   
6 166.3, 141.3, 135.0, 135.0, 134.6, 132.0, 130.3, 128.7, 128.1, 75.1, 47.3, 40.9, 34.3, 31.5, 26.5, 23.6,  
7 22.1, 20.9, 16.6.

8

9 **(1S,4R)-1,3,3-trimethylbicyclo[2.2.1]heptan-2-yl 4-(hydroxydiphenylsilyl)benzoate (2ab)** was  
10 purified by flash column chromatography on silica gel (petroleum

11 ether/ethyl acetate = 5:1). 68 mg, 75% yield, pale yellow oil, known  
12 compound<sup>3</sup>. <sup>1</sup>H NMR (400 MHz, Chloroform-*d*)  $\delta$  8.10 - 8.03 (m, 2H),  
13 7.78 - 7.73 (m, 2H), 7.65 (dt,  $J$  = 6.6, 1.5 Hz, 4H), 7.51 - 7.46 (m, 2H),  
14 7.45 - 7.38 (m, 4H), 4.64 (d,  $J$  = 1.9 Hz, 1H), 2.67 (s, 1H), 2.00 - 1.87 (m,  
15 1H), 1.85 - 1.75 (m, 2H), 1.69 (dq,  $J$  = 10.4, 2.1 Hz, 1H), 1.54 (tdd,  $J$  = 12.5, 5.8, 4.1 Hz, 1H), 1.29  
16 (d,  $J$  = 1.7 Hz, 1H), 1.21 (s, 5H), 1.13 (s, 3H), 0.86 (s, 3H). <sup>13</sup>C NMR (101 MHz, Chloroform-*d*)  $\delta$   
17 167.0, 135.01, 134.98, 134.5, 132.0, 130.4, 128.7, 128.1, 86.9, 48.7, 48.4, 41.5, 39.9, 29.8, 26.9,  
18 25.9, 20.3, 19.5.

19

20 **5-(hydroxydiphenylsilyl)phenyl 2-(4-isobutylphenyl)propanoate (2ac)** was purified by flash  
21 column chromatography on silica gel (petroleum ether/ethyl acetate = 5:1).

22 57 mg, 60% yield, colorless oil, known compound<sup>1</sup>. <sup>1</sup>H NMR (500 MHz,  
23 Chloroform-*d*)  $\delta$  7.63 (td,  $J$  = 6.3, 3.2 Hz, 6H), 7.51 - 7.45 (m, 2H), 7.40 (t,  $J$   
24 = 7.4 Hz, 4H), 7.36 (d,  $J$  = 7.8 Hz, 2H), 7.20 (s, 2H), 7.05 (d,  $J$  = 8.0 Hz, 2H),  
25 4.00 (q,  $J$  = 7.1 Hz, 1H), 3.10 (s, 1H), 2.54 (d,  $J$  = 7.2 Hz, 2H), 1.94 (dq,  $J$  =  
26 13.4, 6.7 Hz, 1H), 1.66 (d,  $J$  = 7.2 Hz, 3H), 0.98 (d,  $J$  = 6.7 Hz, 6H). <sup>13</sup>C NMR (126 MHz,  
27 Chloroform-*d*)  $\delta$  173.3, 152.6, 140.9, 137.2, 136.4, 135.0, 135.0, 132.7, 130.2, 129.6, 128.0, 127.3,  
28 121.0, 45.4, 45.1, 30.3, 22.5, 18.6.

29

1

## 2 **3 References:**

- 3 1. H. Liang, L. Wang, Y. Ji, H. Wang, B. Zhang, *Angew. Chem. Int. Ed.*, **2021**, *60*, 1839-1844.
- 4 2. P. He, F. Zhang, X. Si, W. Jiang, Q. Shen, Z. Li, Z. Zhu, S. Tang, Q. Gui, *Synthesis*, **2023**, *55*,
- 5 765-772.
- 6 3. M. Cerny, *Collect. Czech. Chem. Commun.*, **1976**, *41*, 114-118.
- 7 4. S. Li, H. Li, C. Tung, L. Liu, *ACS Catal.*, **2022**, *12*, 9143-9152.
- 8 5. W. Yuan, P. Orecchia, M. Oestreich, *Chem. Eur. J.*, **2018**, *24*, 19175-19178.
- 9 6. J. Cao, X. Yang, L. Ma, K. Lu, R. Zhou, *Green Chem.*, **2021**, *23*, 8988-8994.
- 10 7. K. Qiao, H. Li, Z. Chen, Y. Zhu, W. Jiang, F. Li, L. Shi, *J. Catal.*, **2025**, *447* 116133-116133.
- 11

# 1 4 Copies of NMR for the Compounds

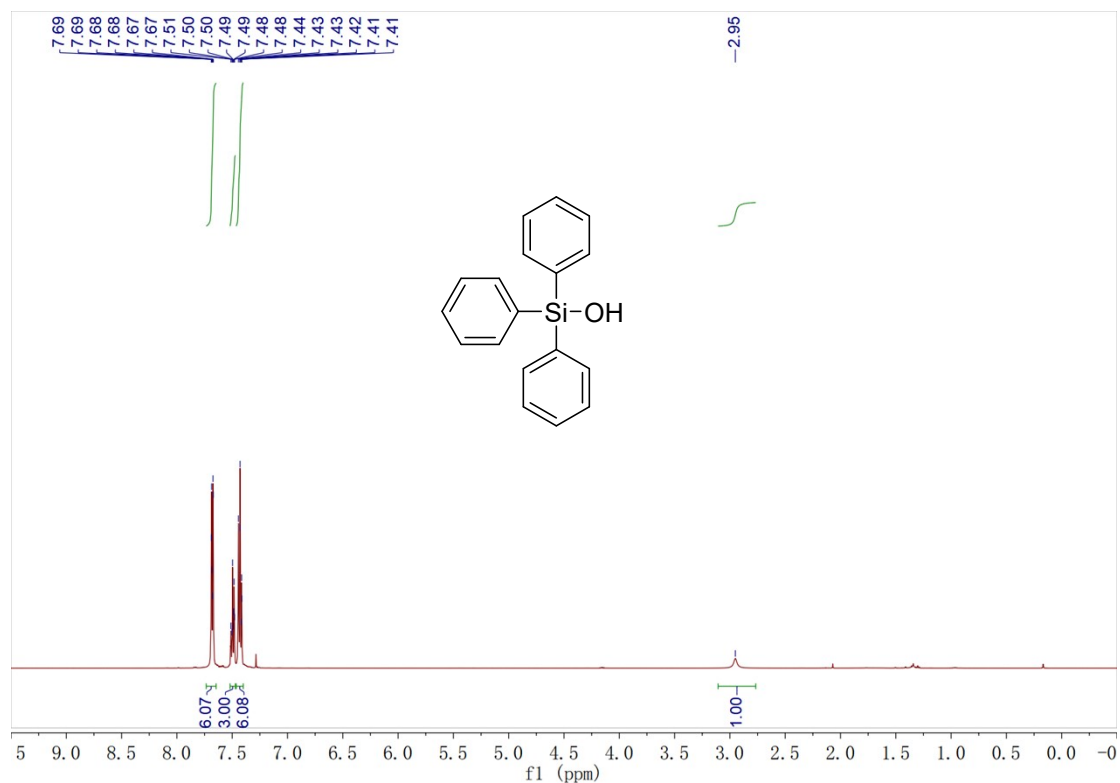

2

3

<sup>1</sup>H NMR (500 MHz, CDCl<sub>3</sub>) of **2a**

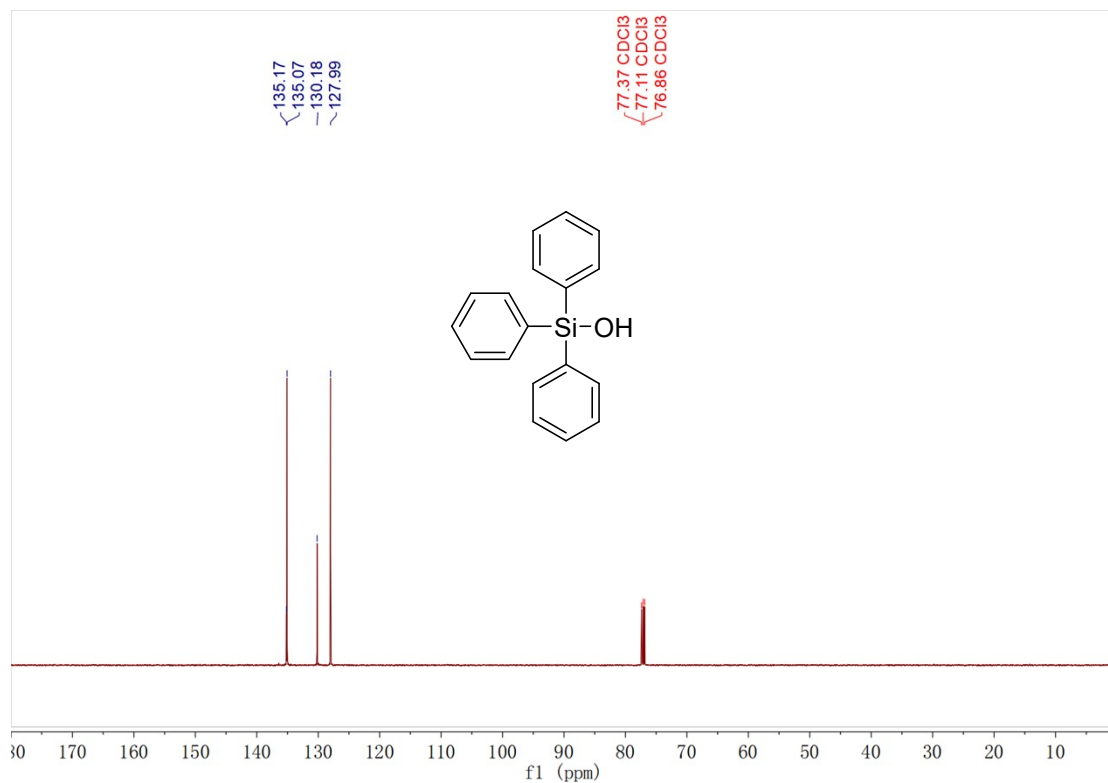

4

5

<sup>13</sup>C NMR (126 MHz, CDCl<sub>3</sub>) of **2a**

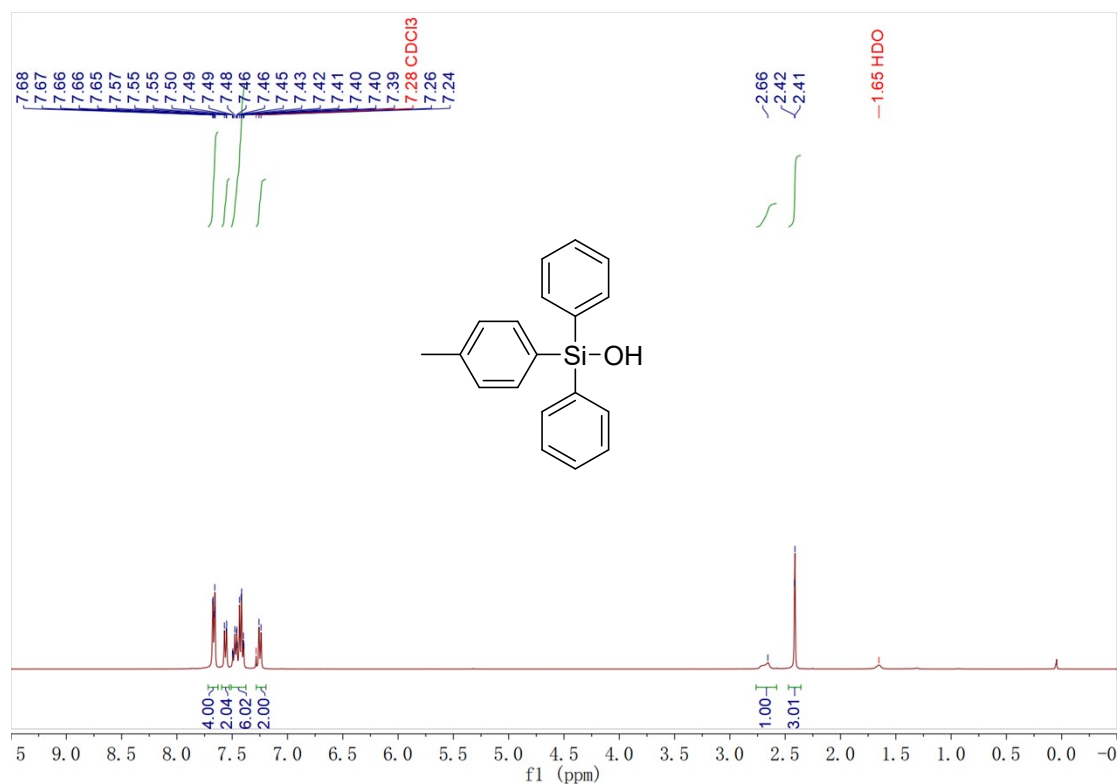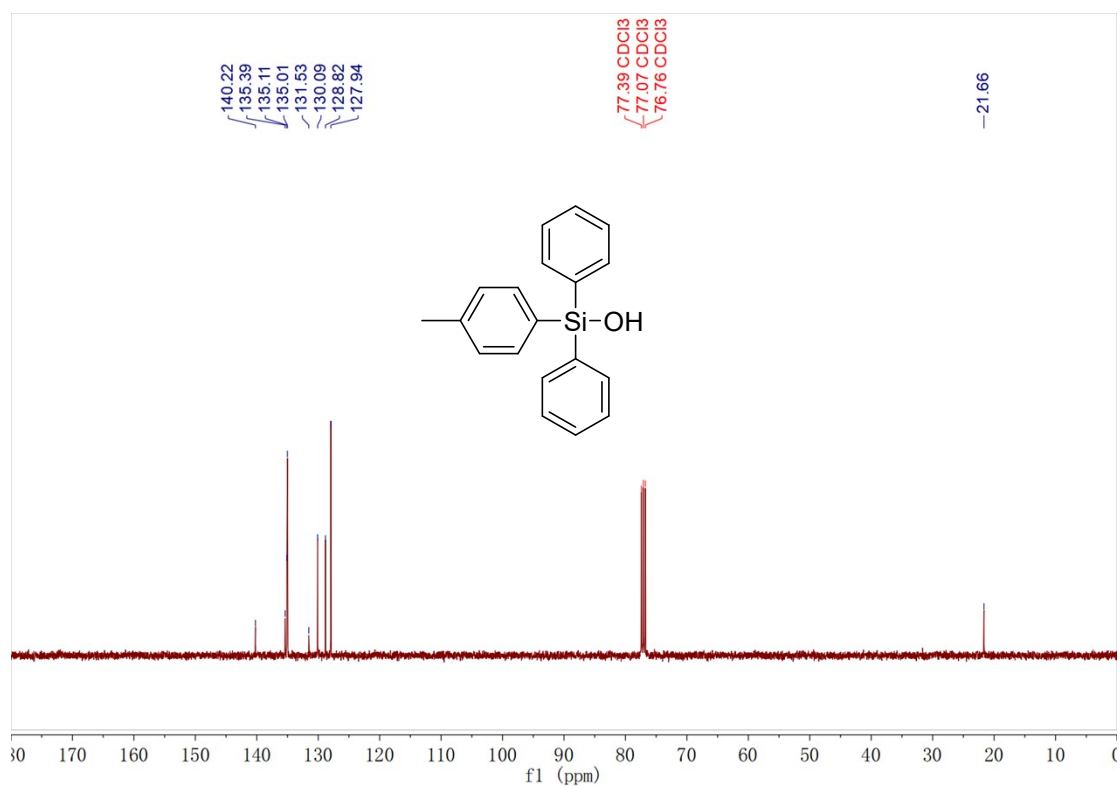

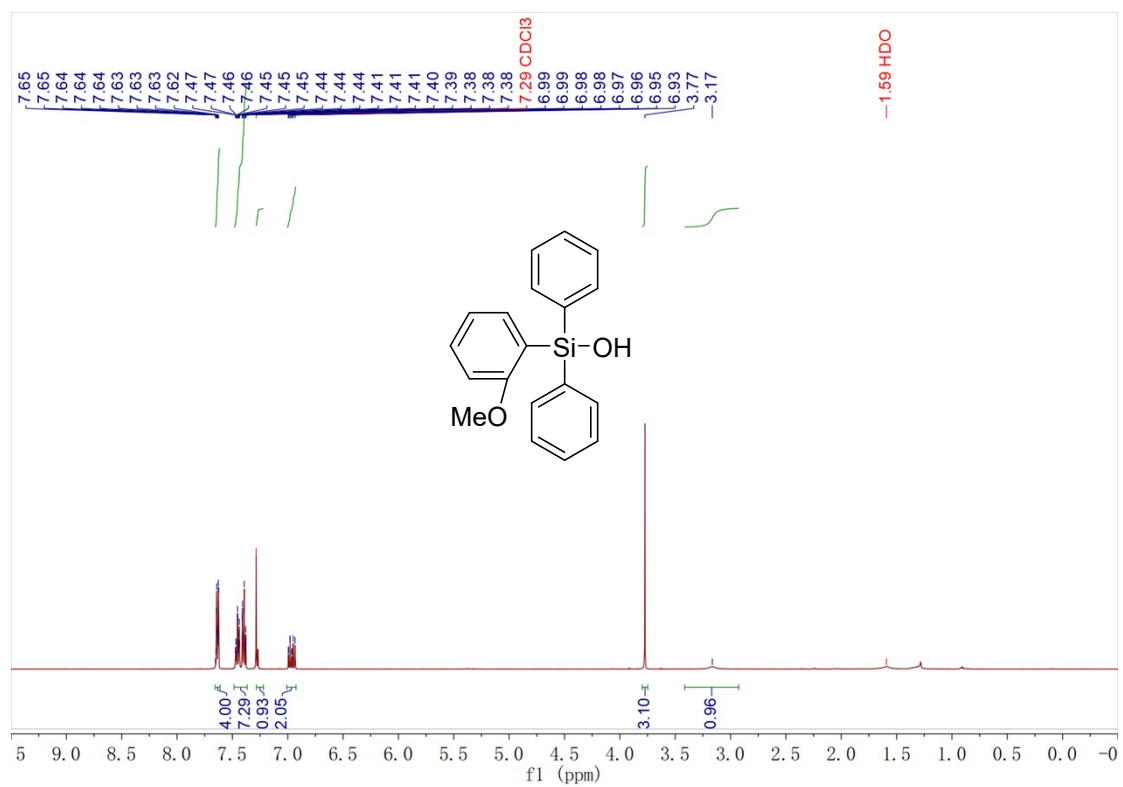

<sup>1</sup>H NMR (500 MHz, CDCl<sub>3</sub>) of **2c**

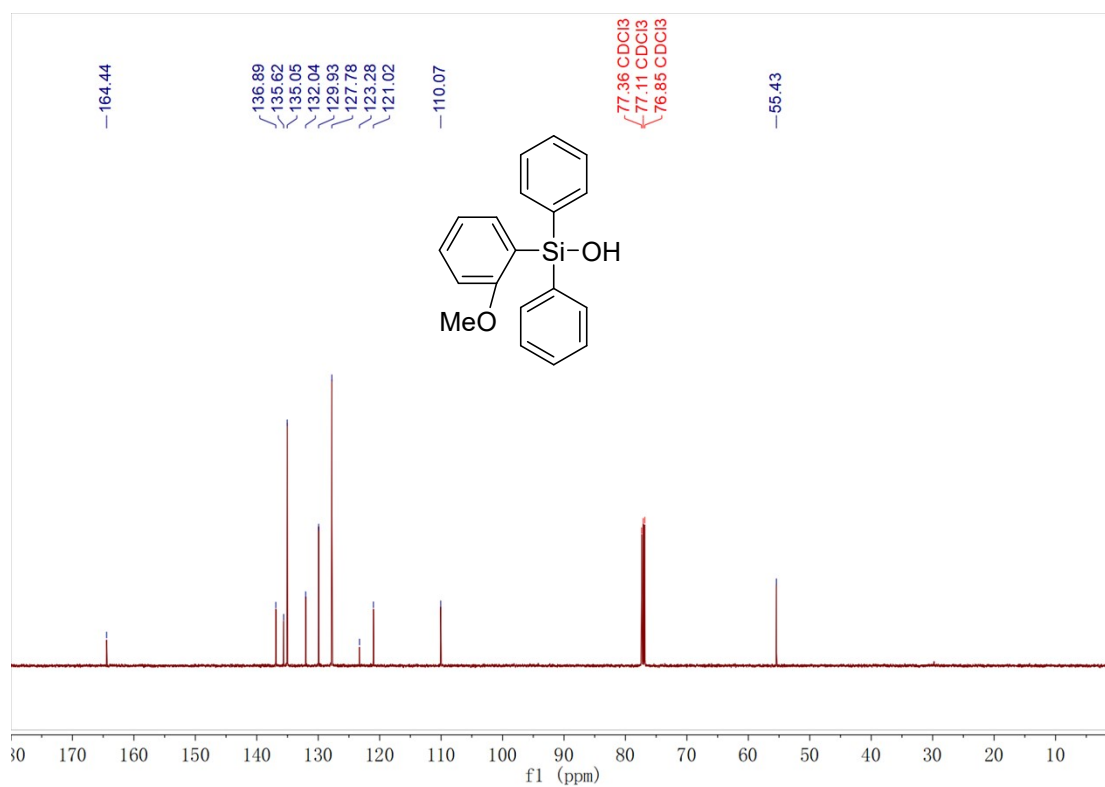

<sup>13</sup>C NMR (126 MHz, CDCl<sub>3</sub>) of **2c**

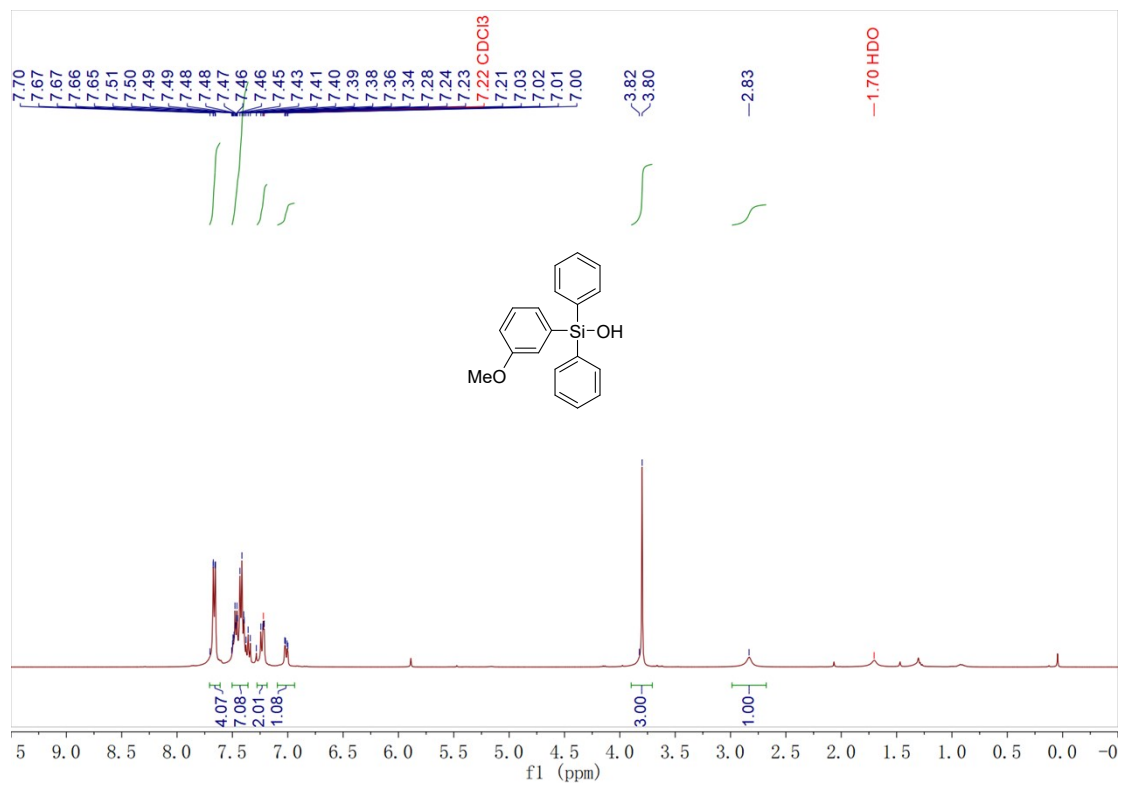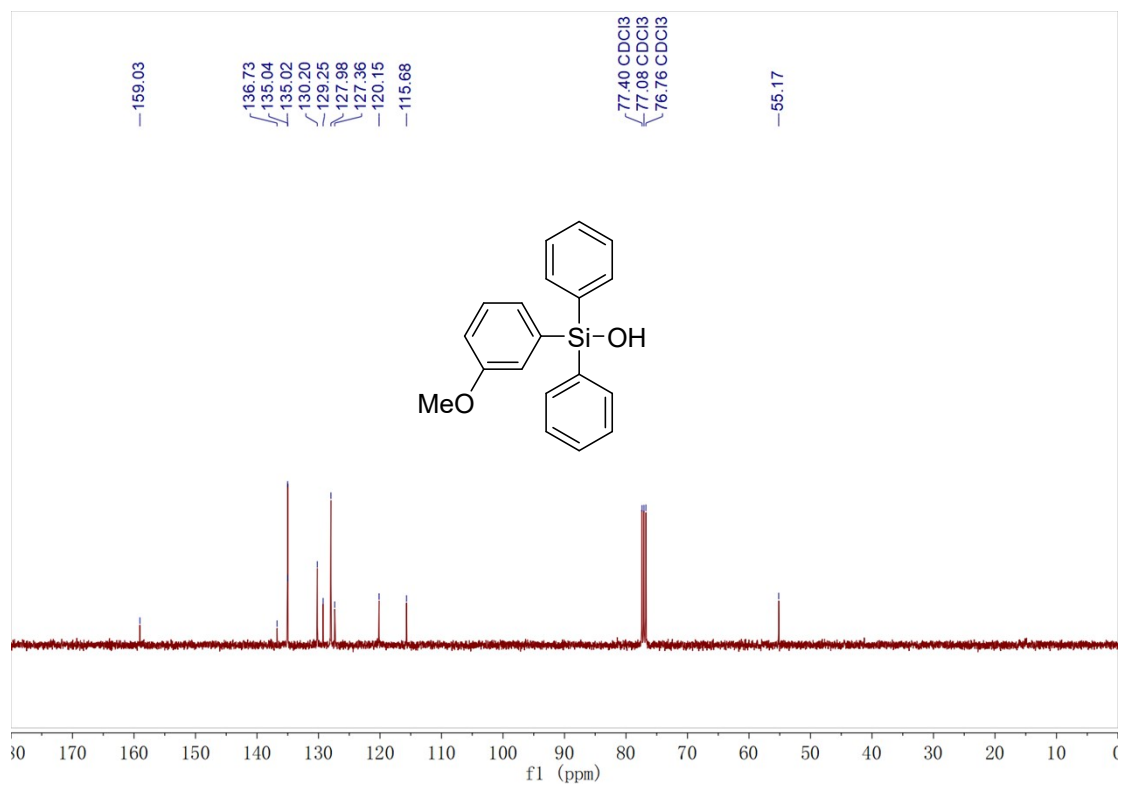

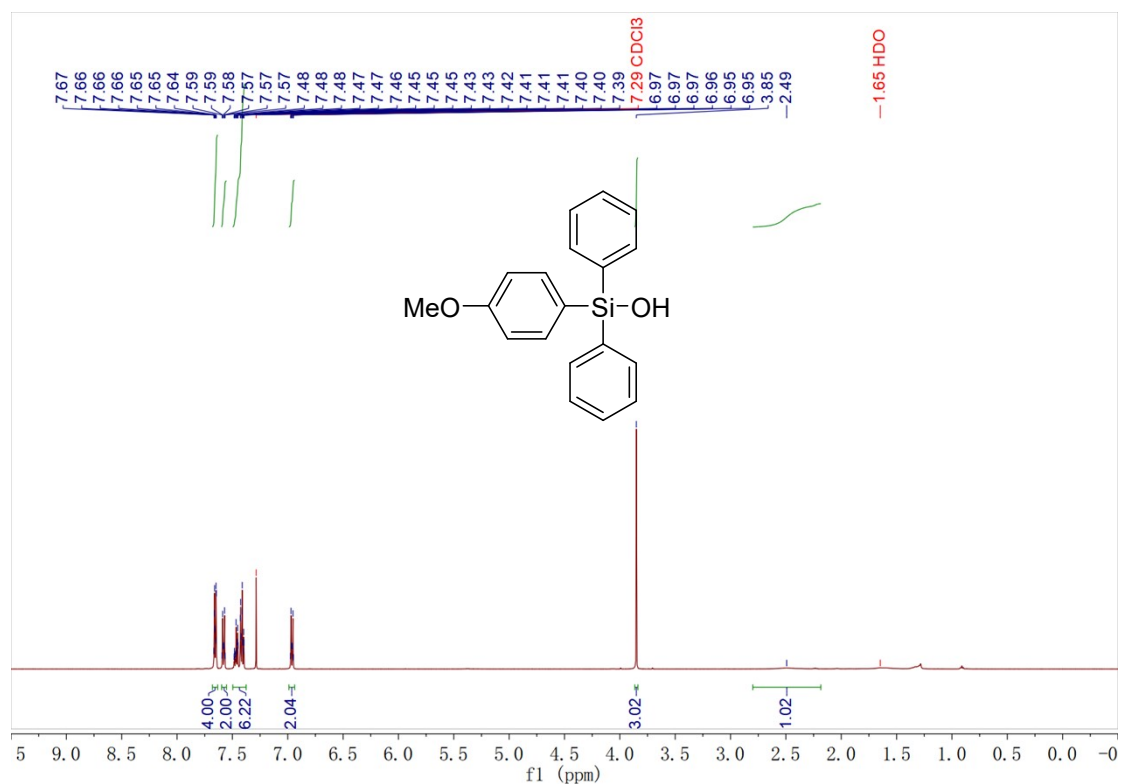

<sup>1</sup>H NMR (400 MHz, CDCl<sub>3</sub>) of **2e**

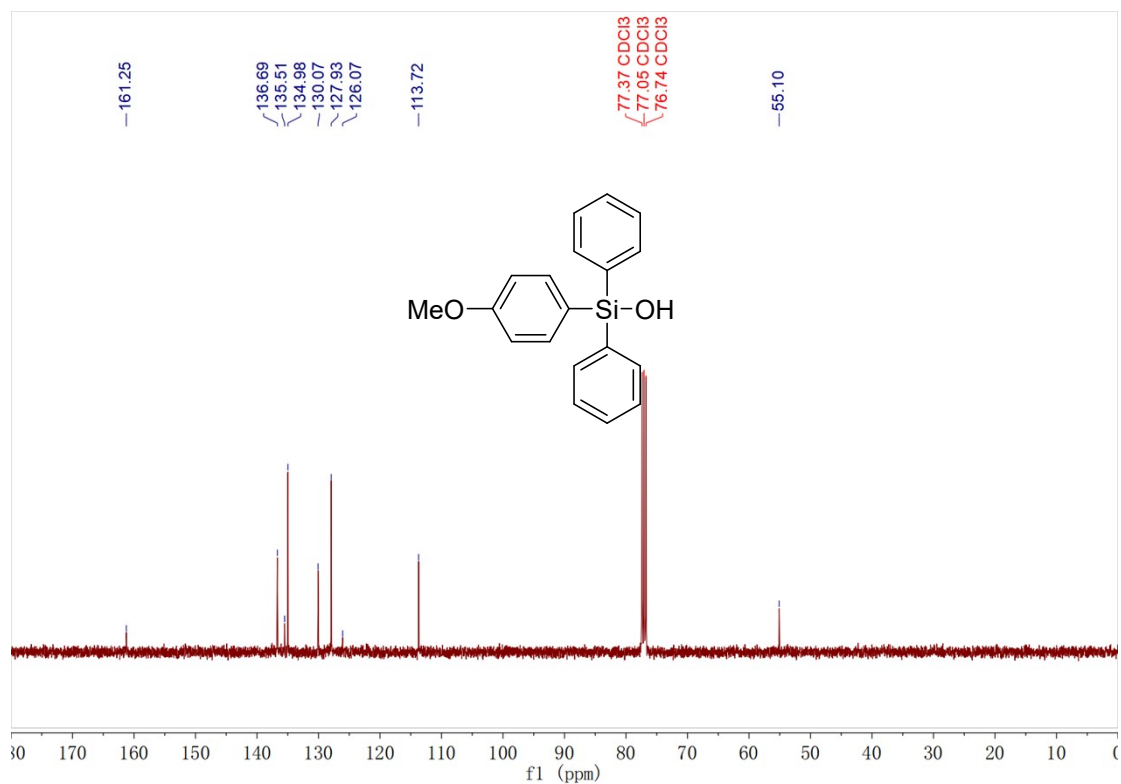

<sup>13</sup>C NMR (100 MHz, CDCl<sub>3</sub>) of **2e**

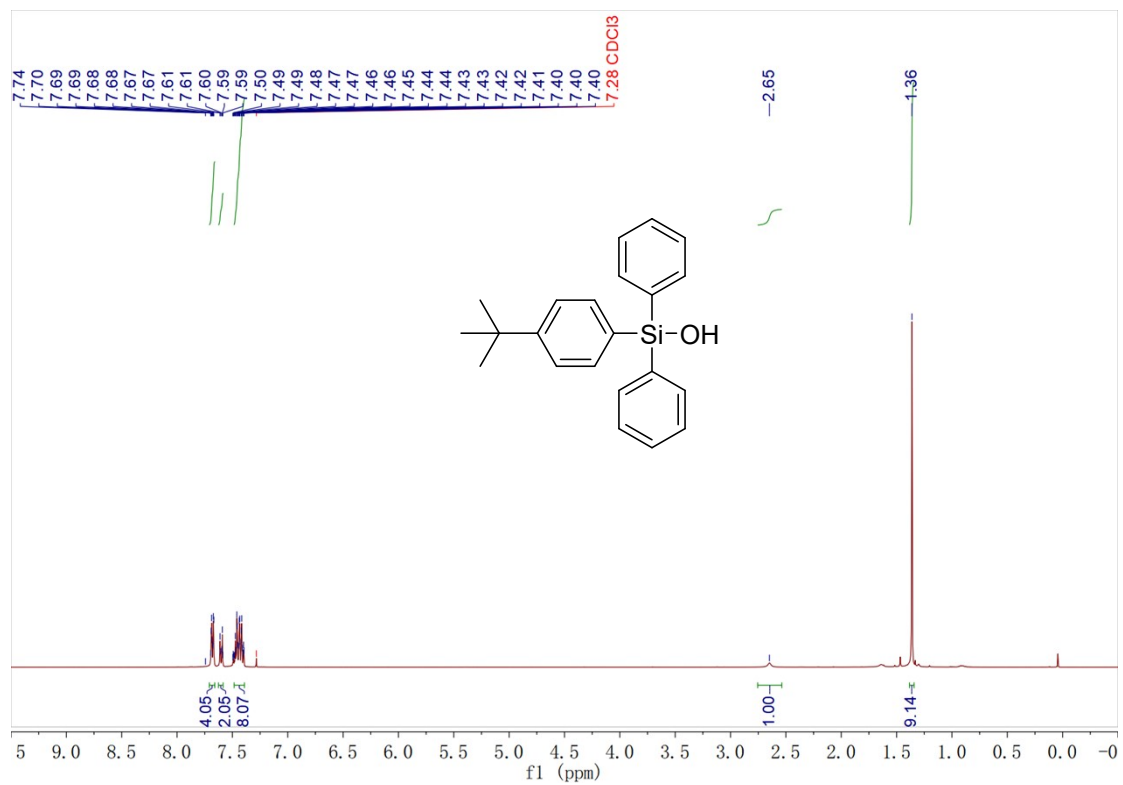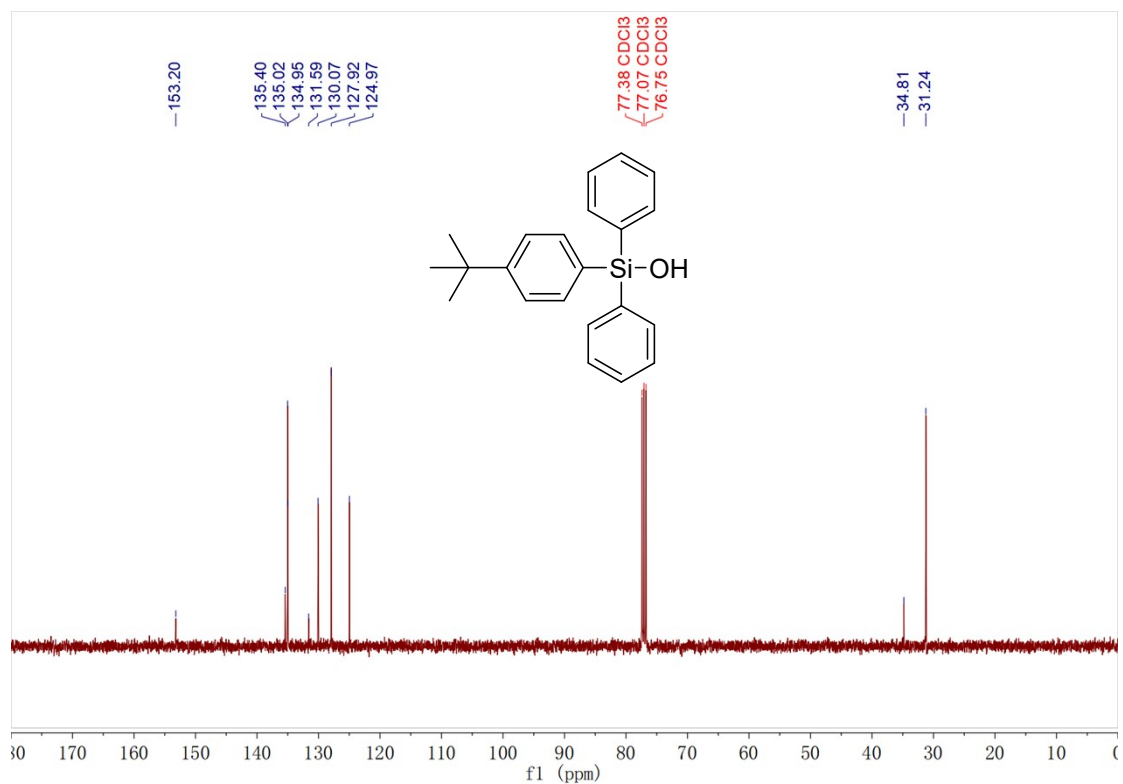

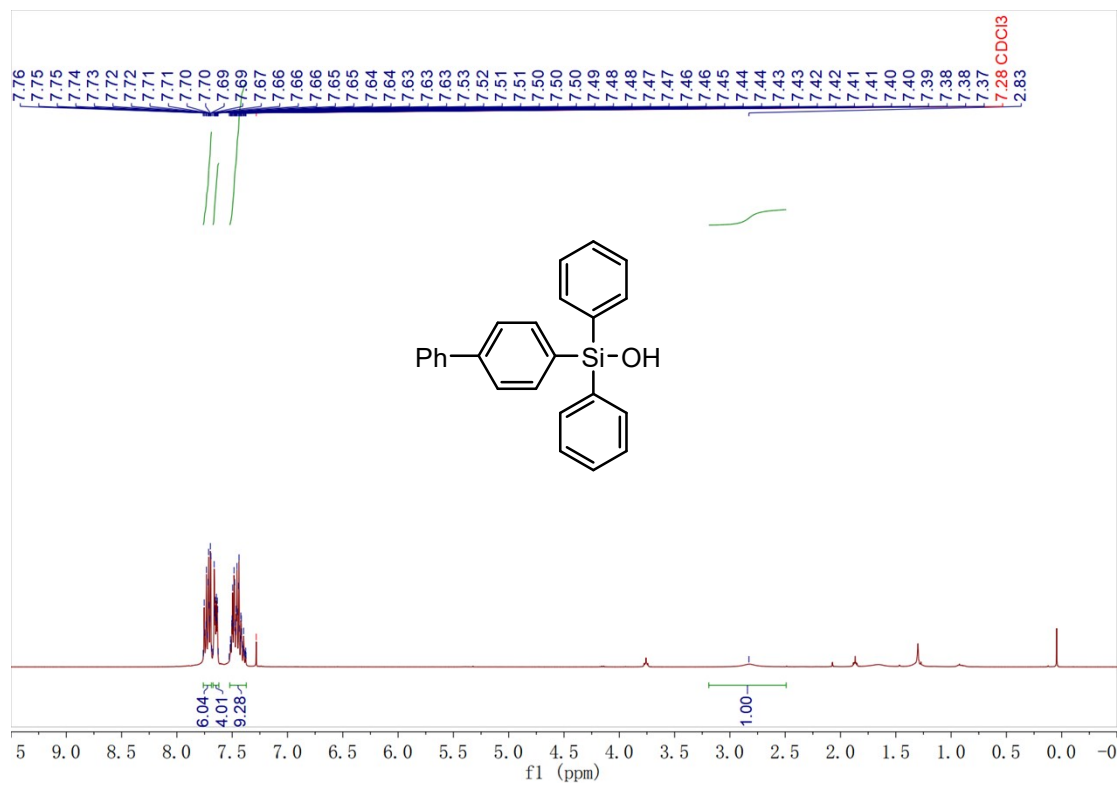

<sup>1</sup>H NMR (400 MHz, CDCl<sub>3</sub>) of **2g**

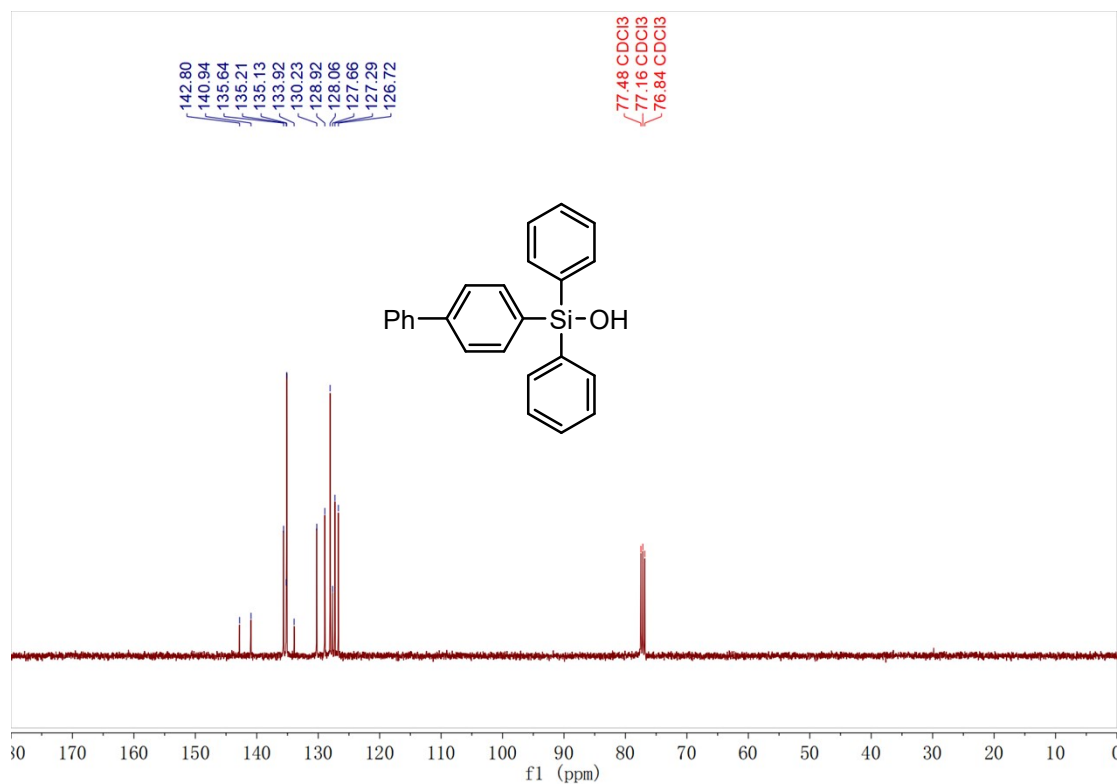

<sup>13</sup>C NMR (100 MHz, CDCl<sub>3</sub>) of **2g**

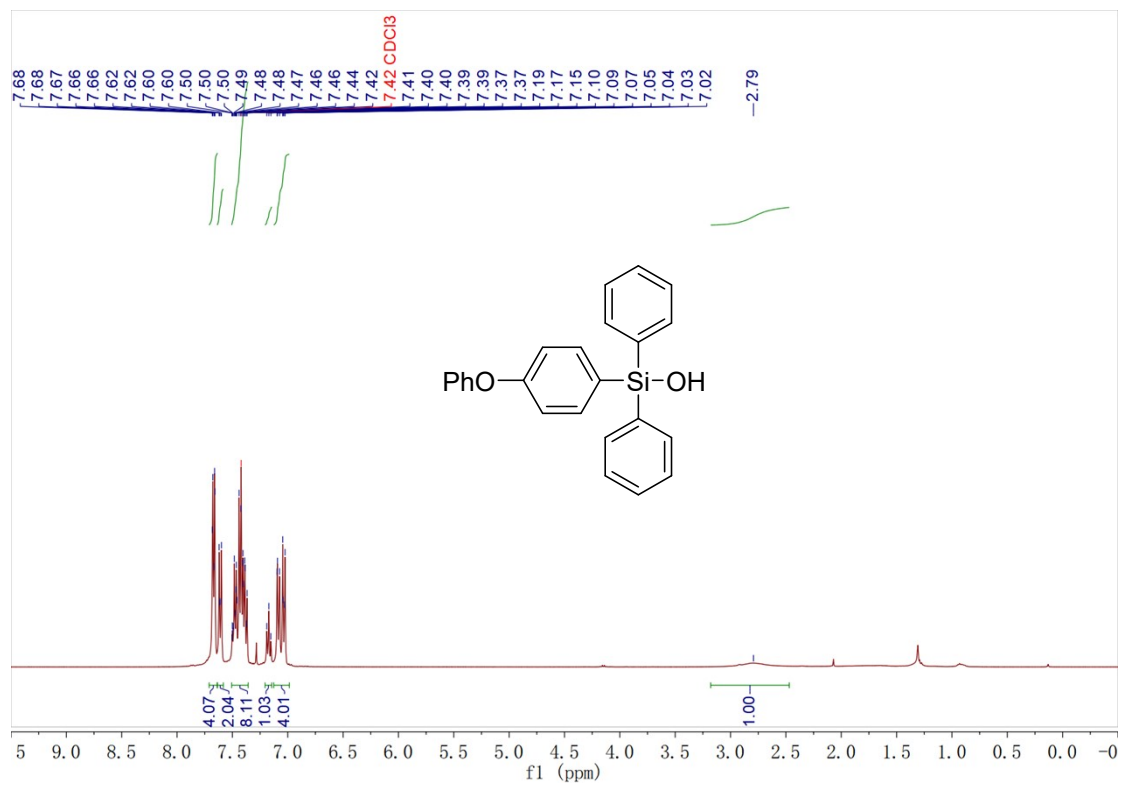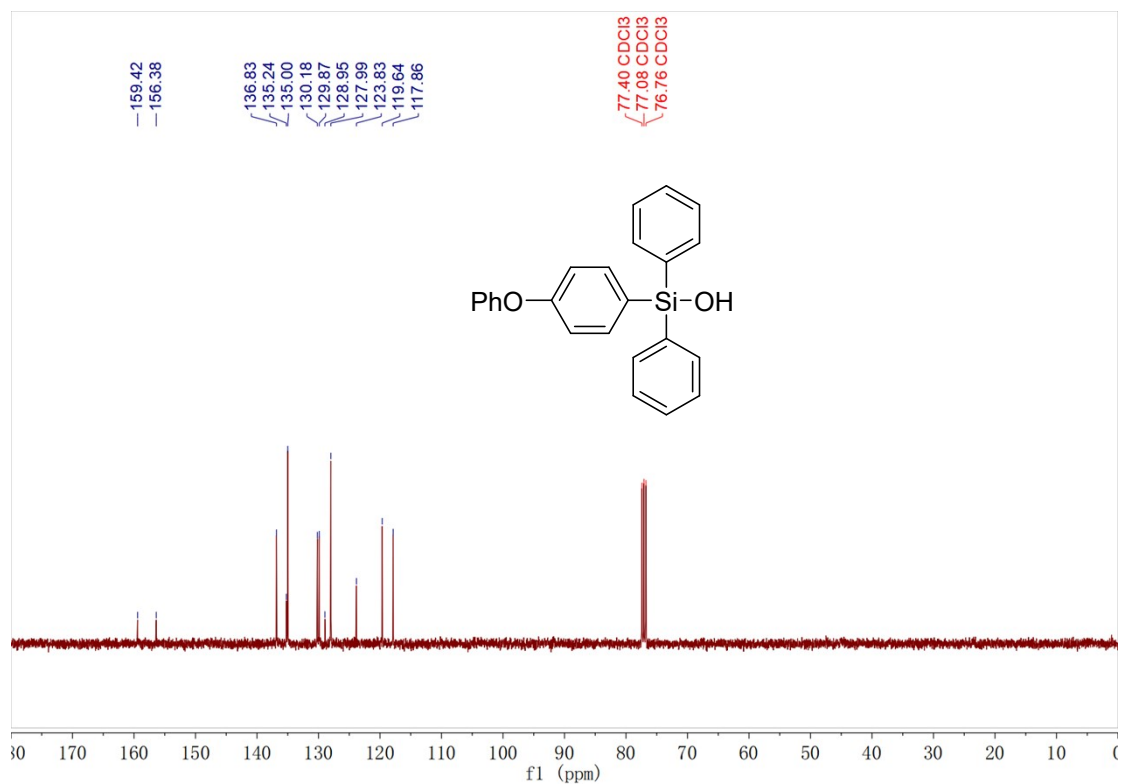

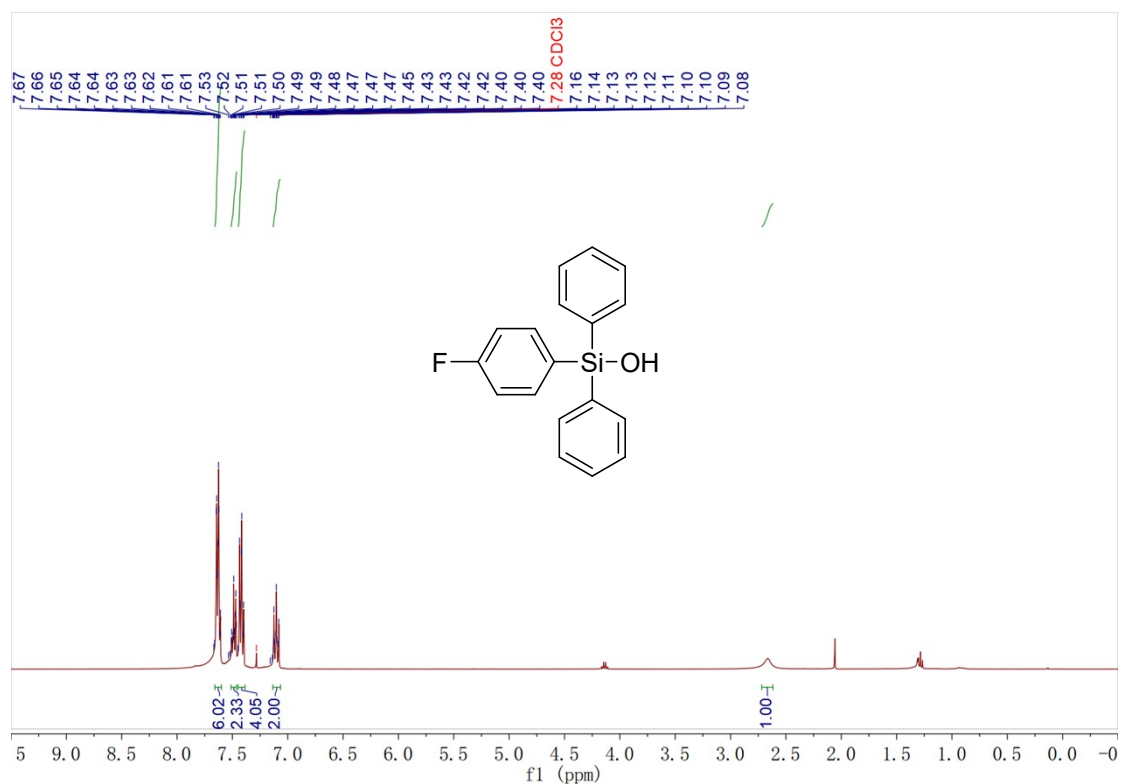

$^1\text{H NMR}$  (400 MHz,  $\text{CDCl}_3$ ) of **2i**

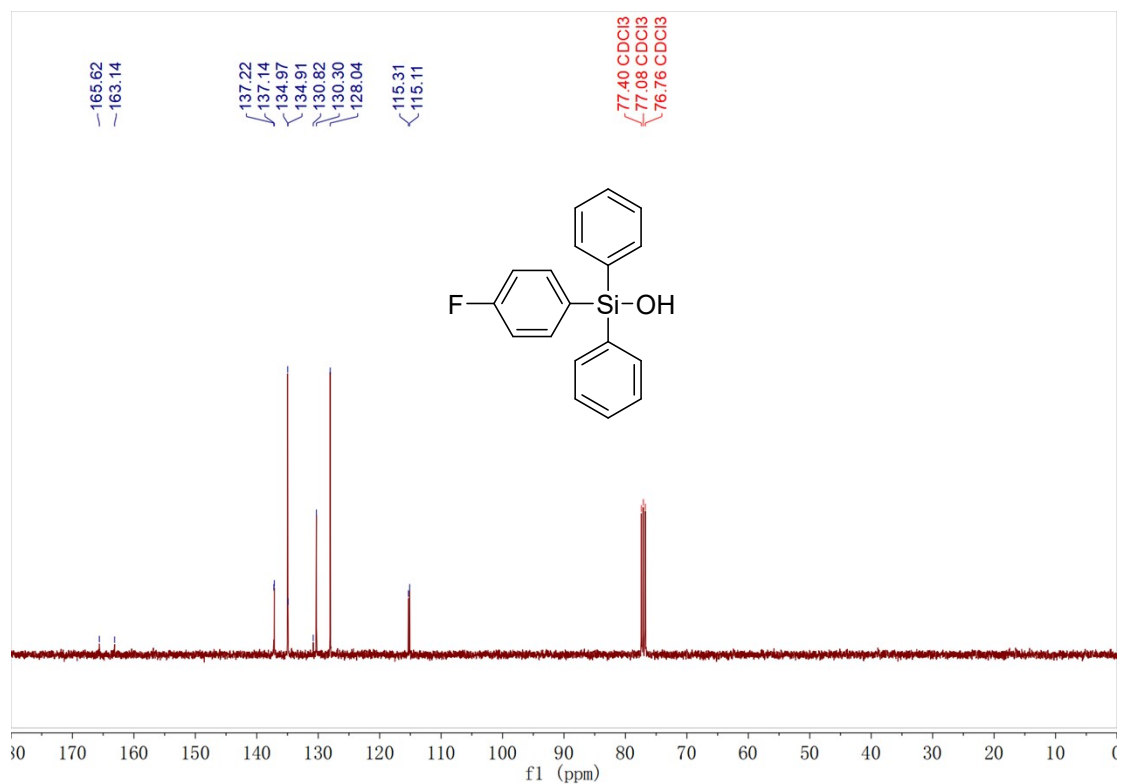

$^{13}\text{C NMR}$  (100 MHz,  $\text{CDCl}_3$ ) of **2i**

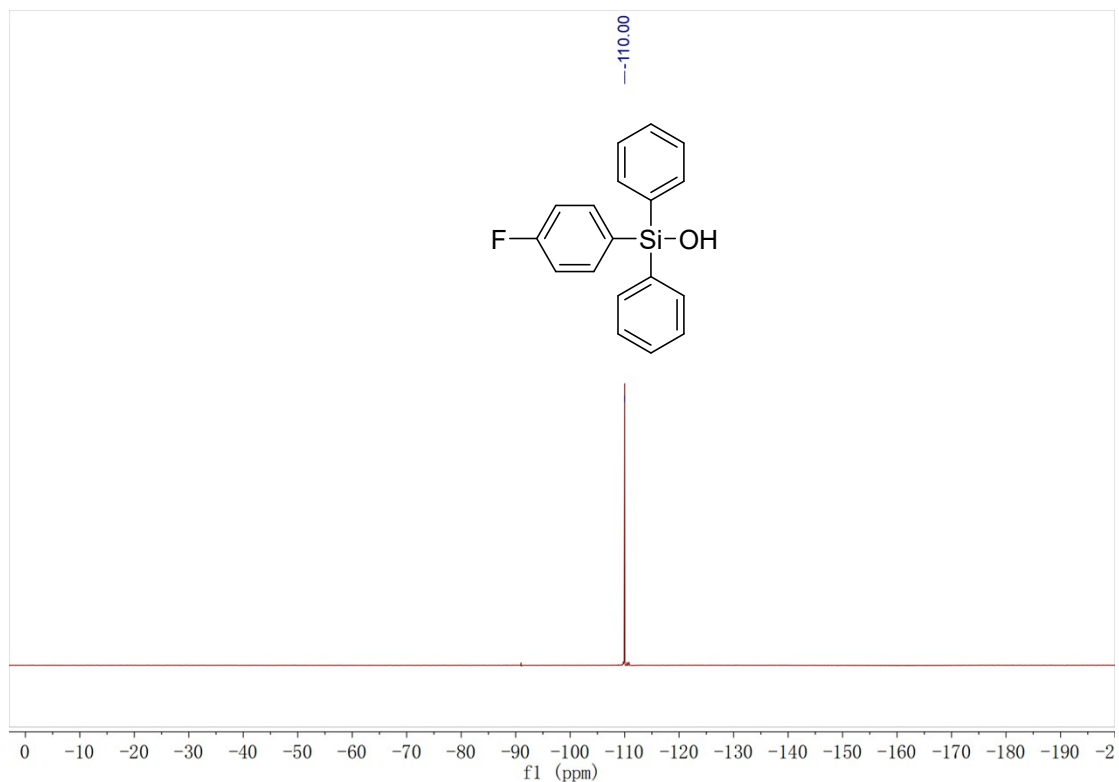

$^{19}\text{F}$  NMR (377 MHz,  $\text{CDCl}_3$ ) of **2i**

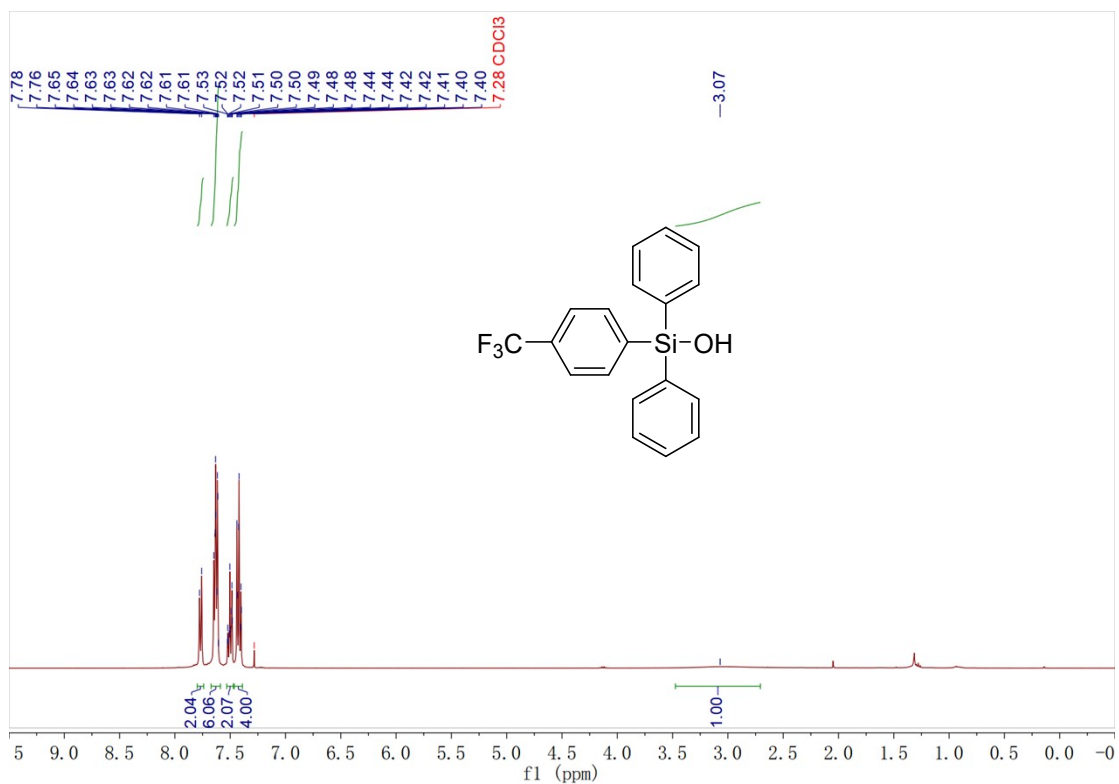

$^1\text{H}$  NMR (400 MHz,  $\text{CDCl}_3$ ) of **2j**

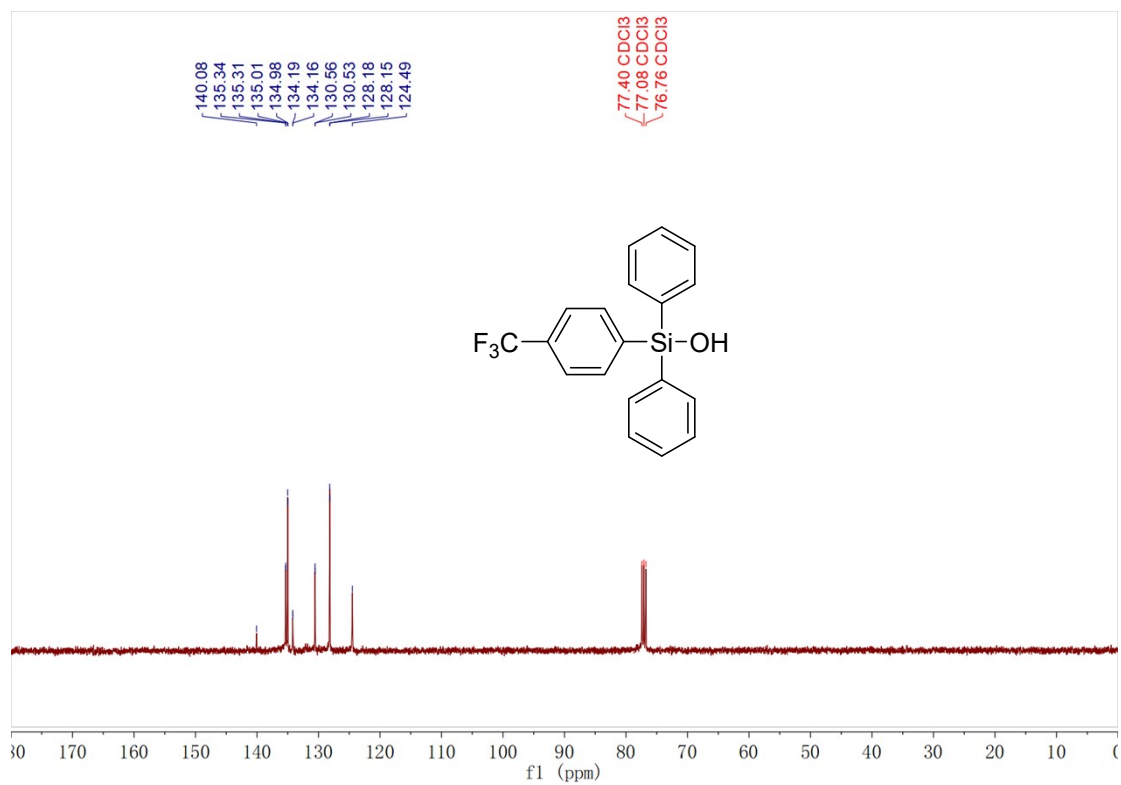

<sup>13</sup>C NMR (100 MHz, CDCl<sub>3</sub>) of **2j**

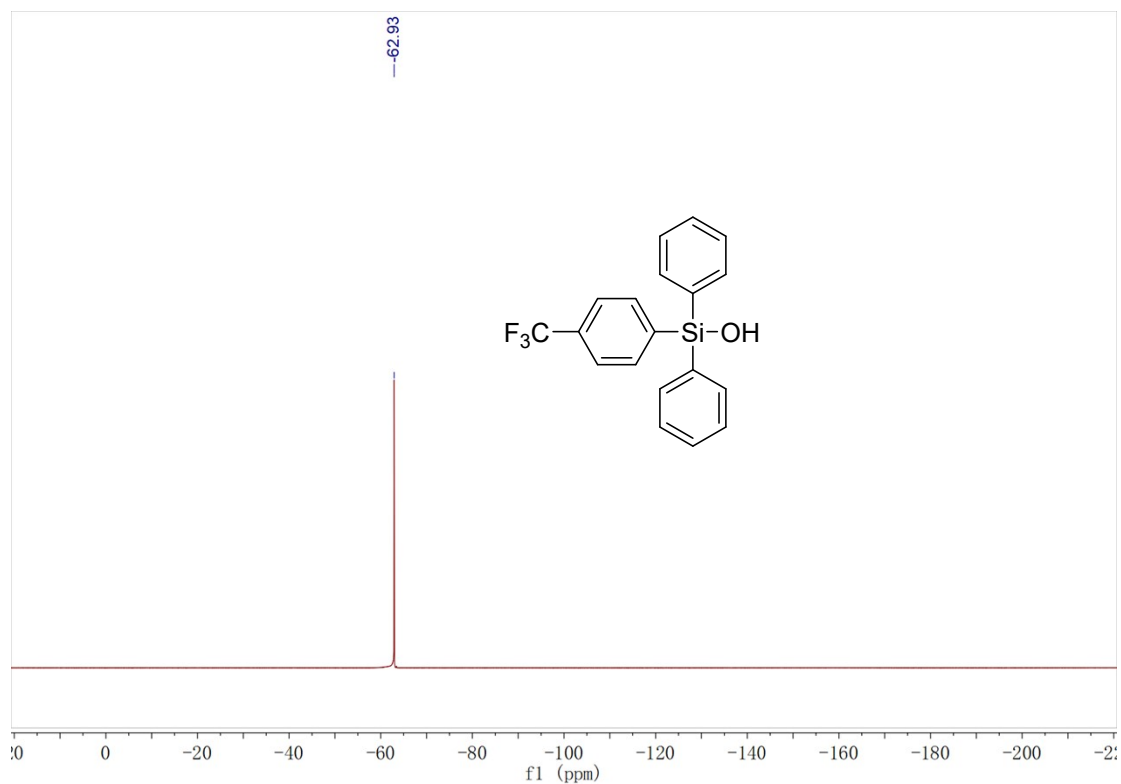

<sup>19</sup>F NMR (377 MHz, CDCl<sub>3</sub>) of **2j**

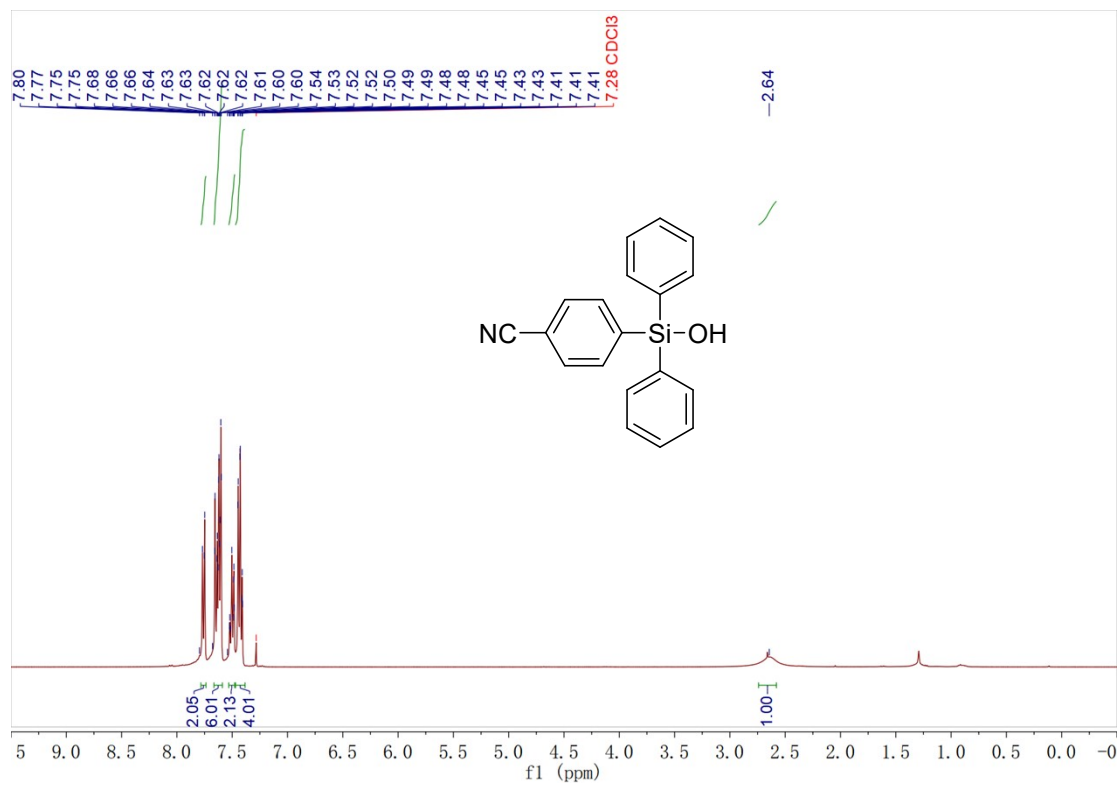

<sup>1</sup>H NMR (400 MHz, CDCl<sub>3</sub>) of **2k**

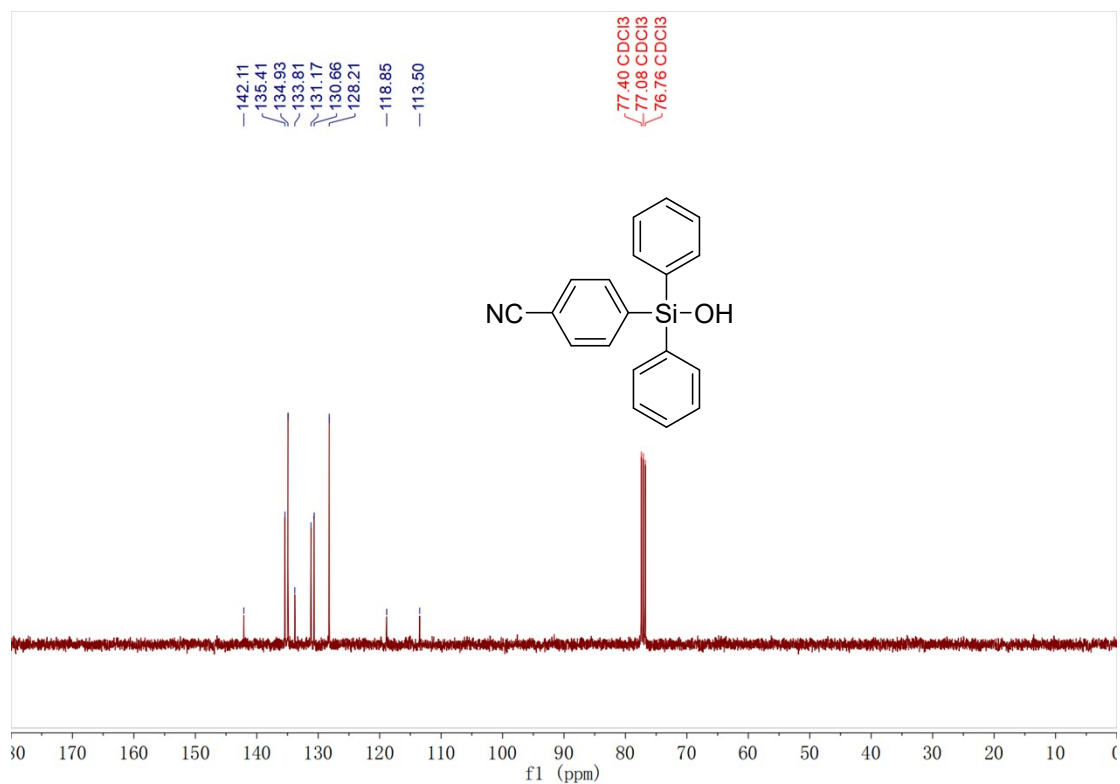

<sup>13</sup>C NMR (100 MHz, CDCl<sub>3</sub>) of **2k**

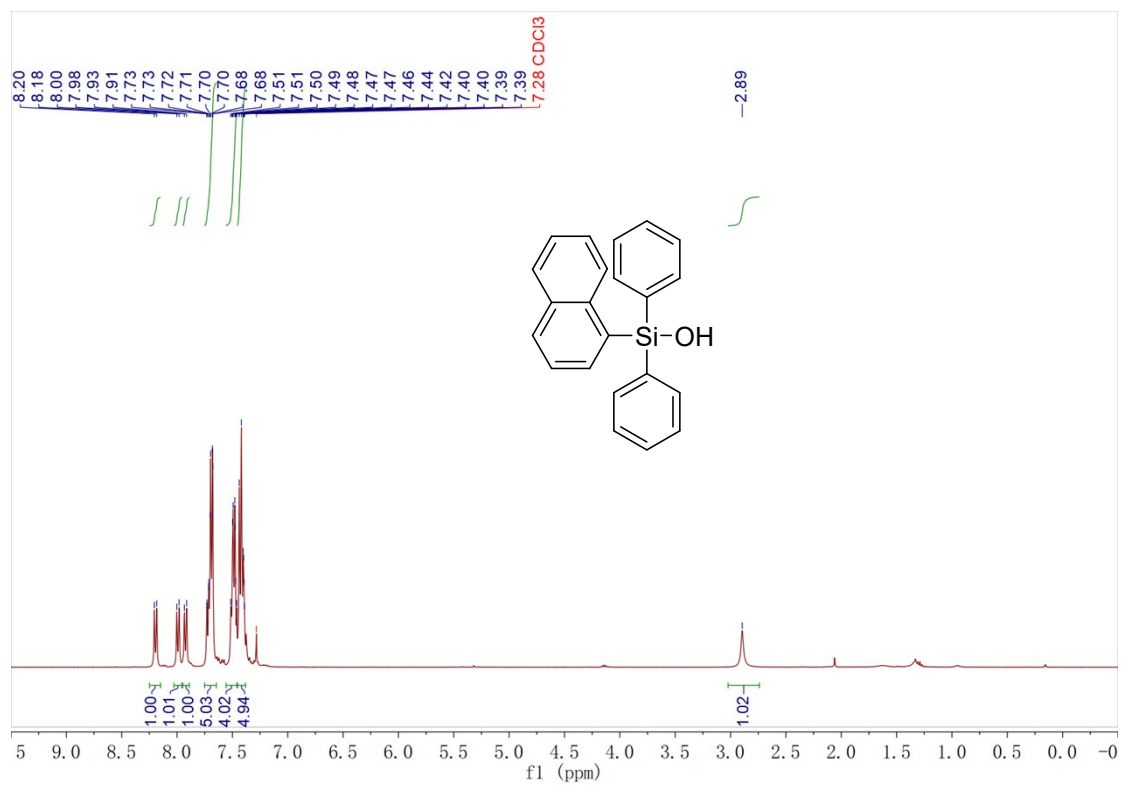

$^1\text{H NMR}$  (400 MHz,  $\text{CDCl}_3$ ) of **21**

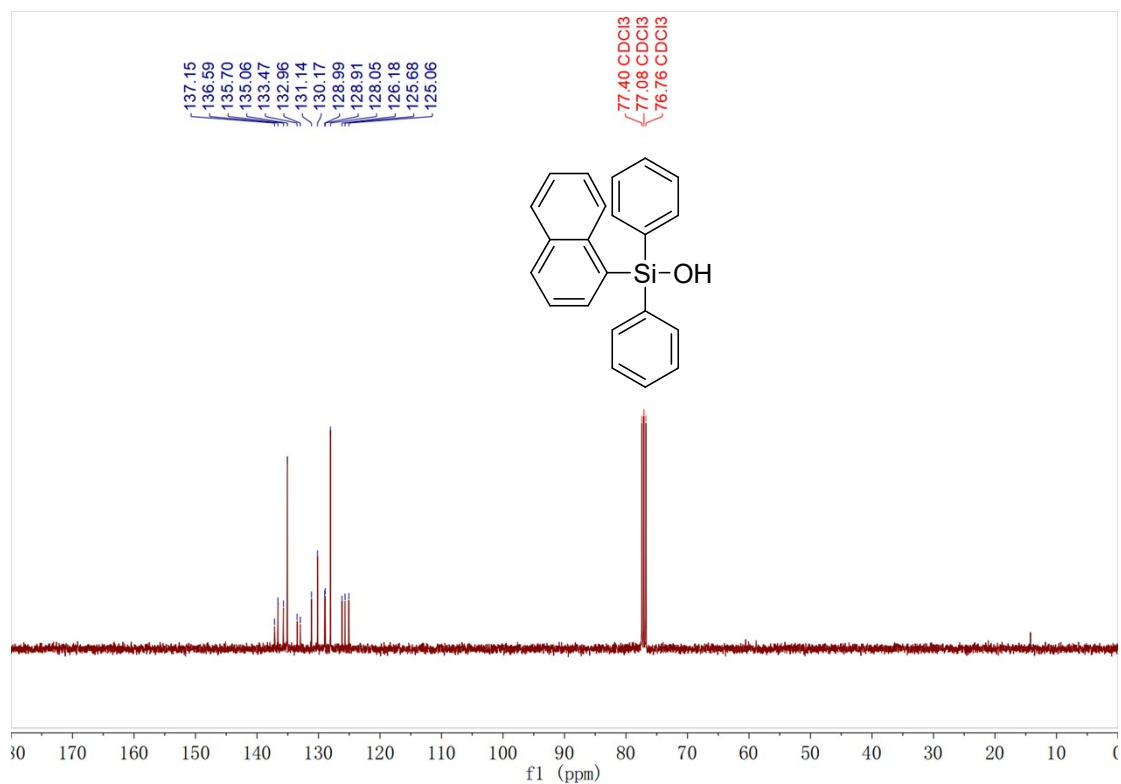

$^{13}\text{C NMR}$  (100 MHz,  $\text{CDCl}_3$ ) of **21**



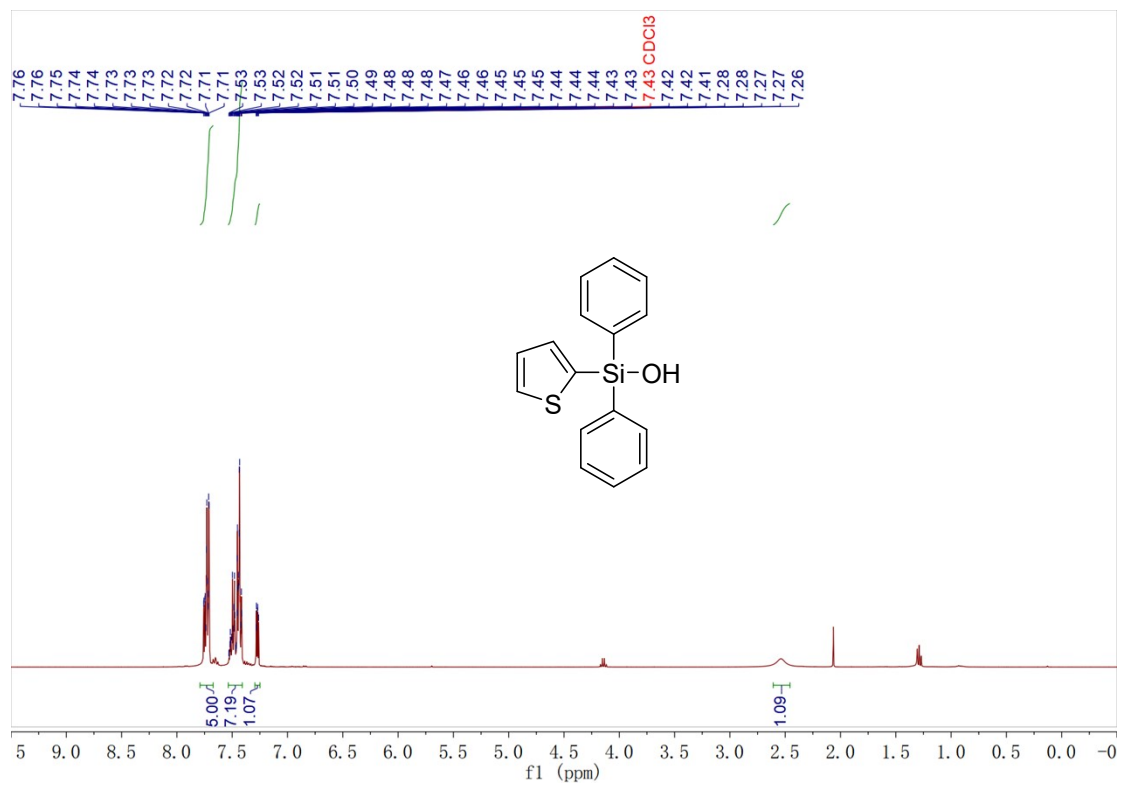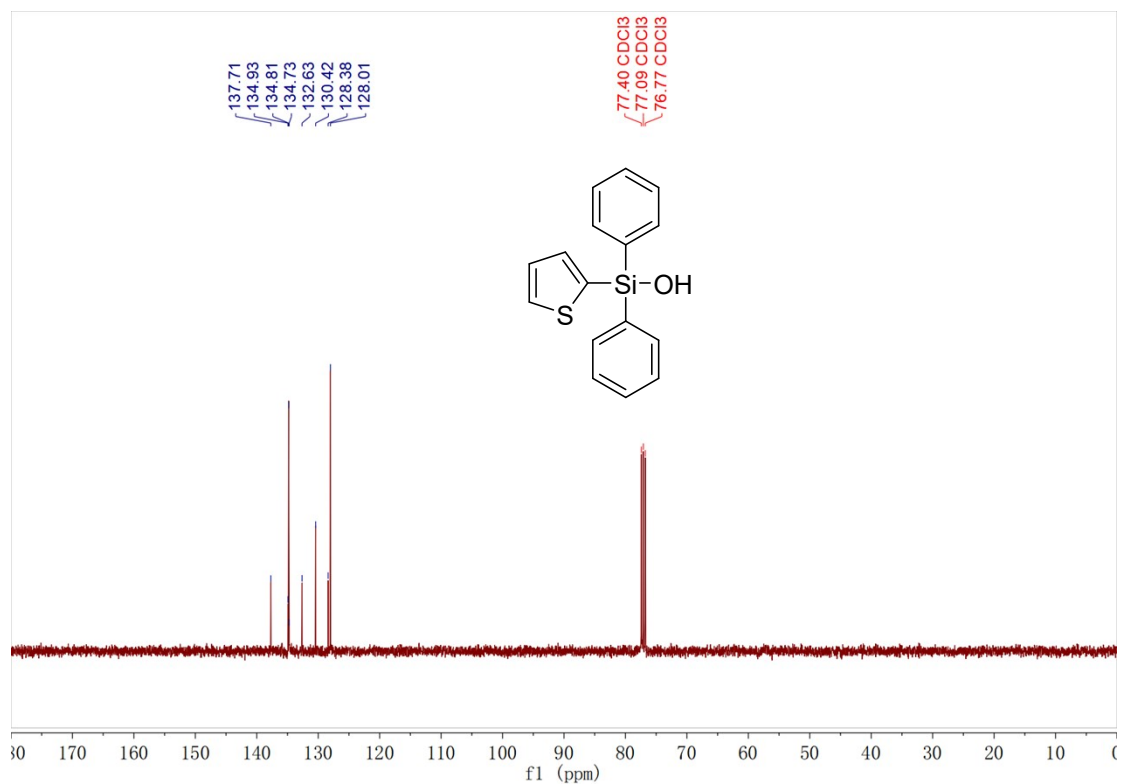

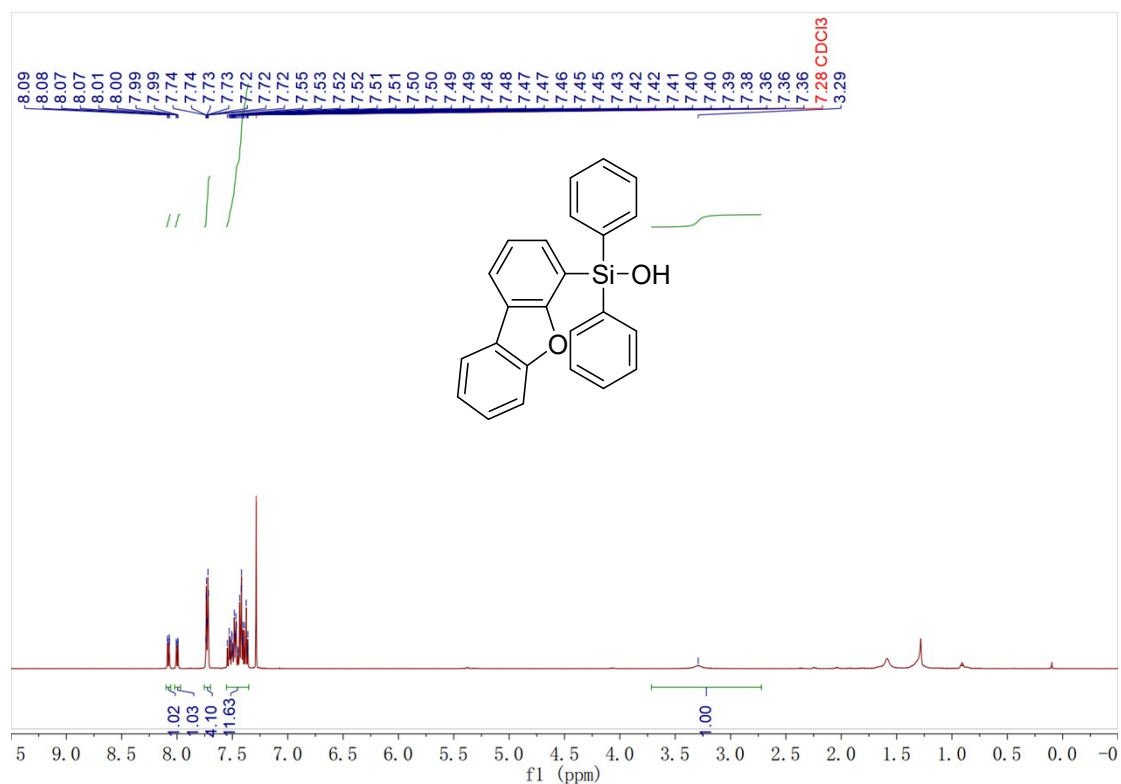

<sup>1</sup>H NMR (500 MHz, CDCl<sub>3</sub>) of **2o**

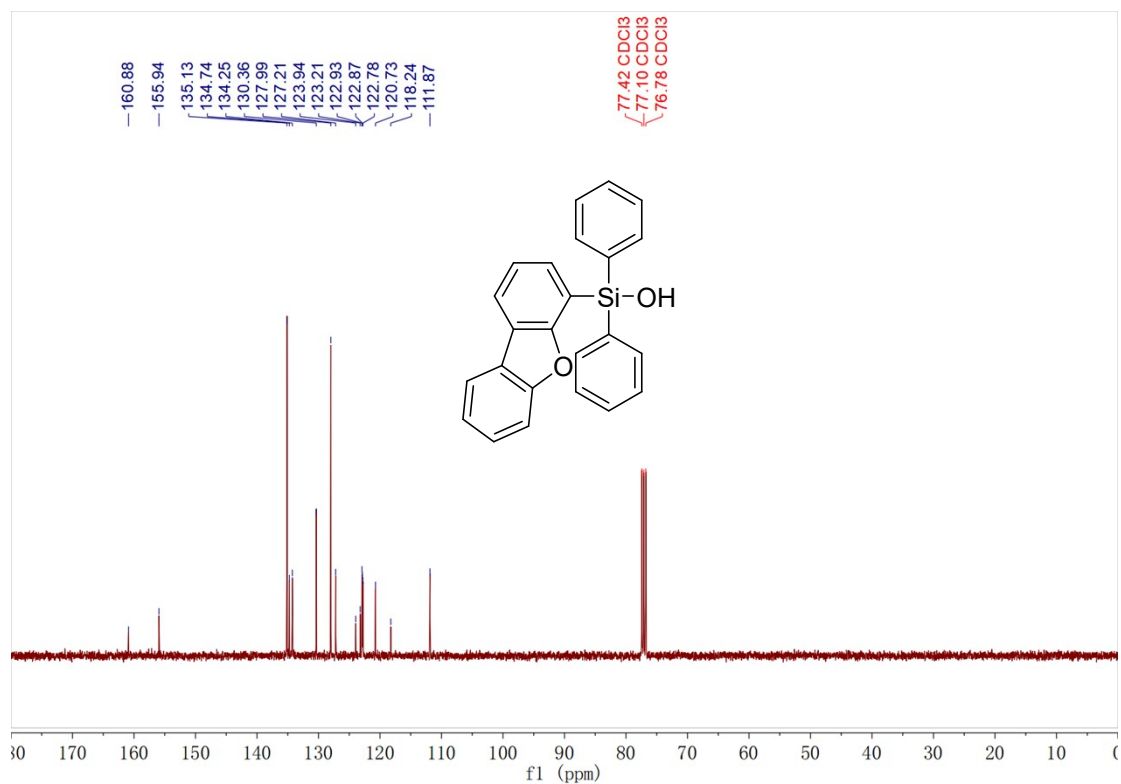

<sup>13</sup>C NMR (100 MHz, CDCl<sub>3</sub>) of **2o**

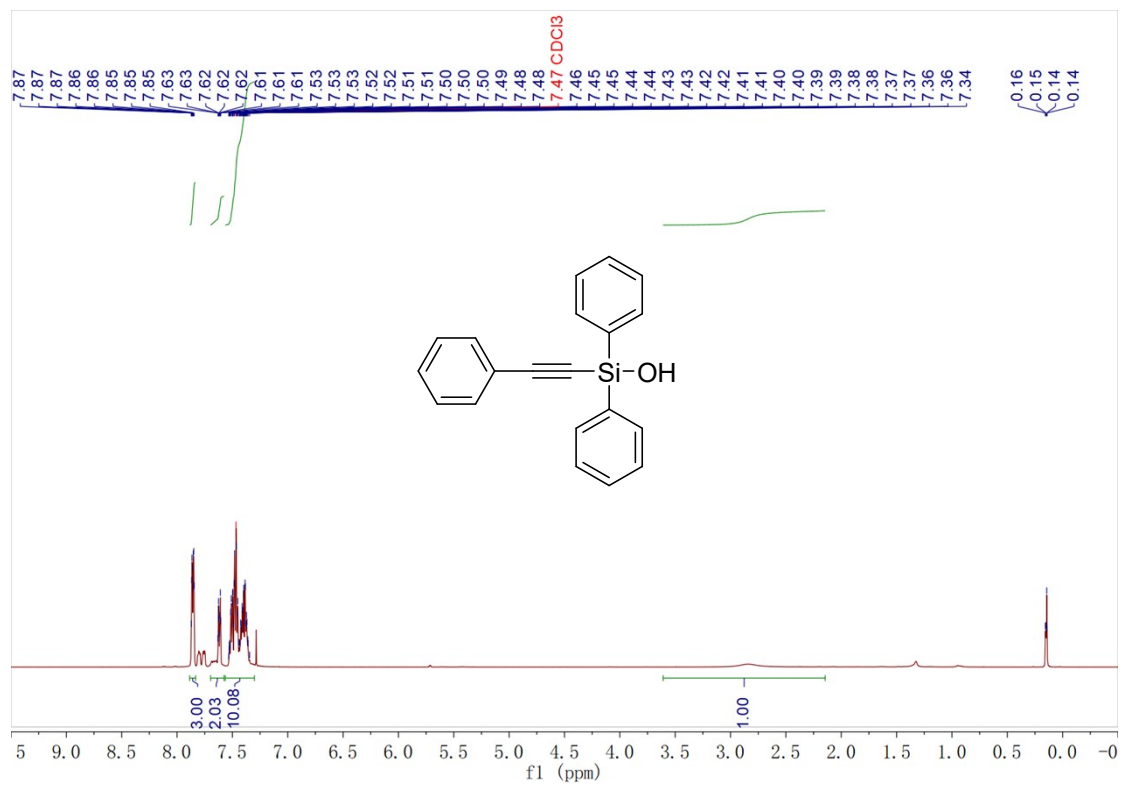

$^1\text{H NMR}$  (500 MHz,  $\text{CDCl}_3$ ) of **2p**

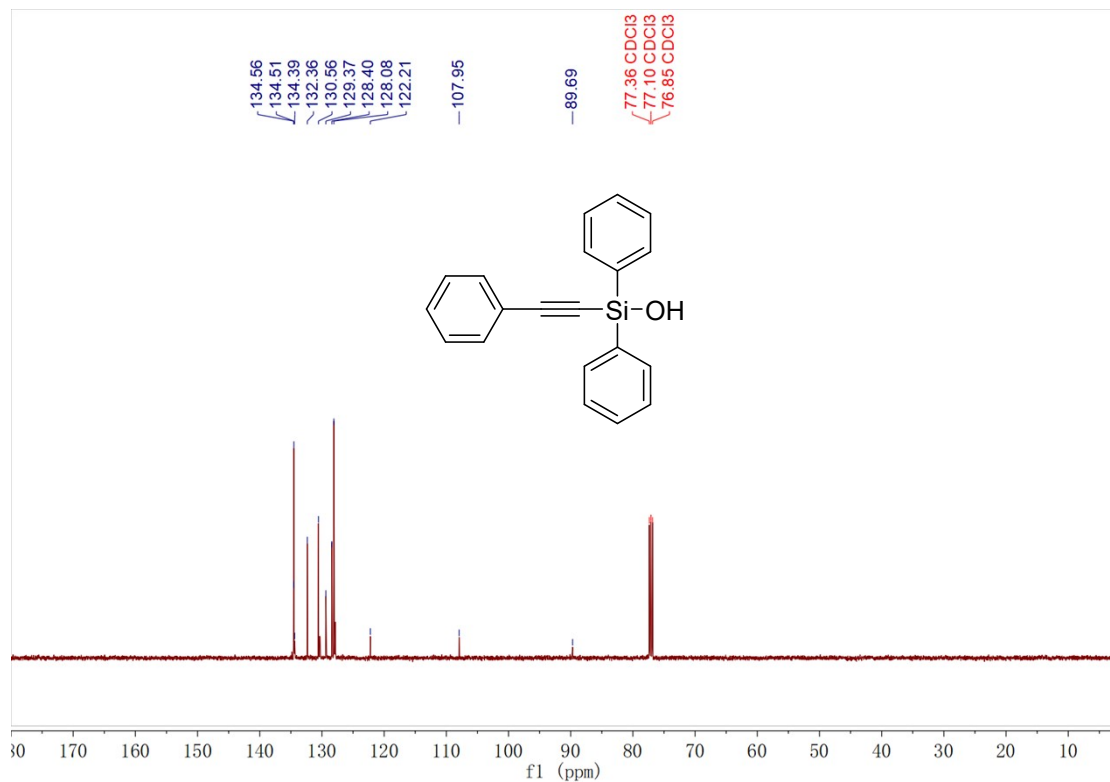

$^{13}\text{C NMR}$  (126 MHz,  $\text{CDCl}_3$ ) of **2p**

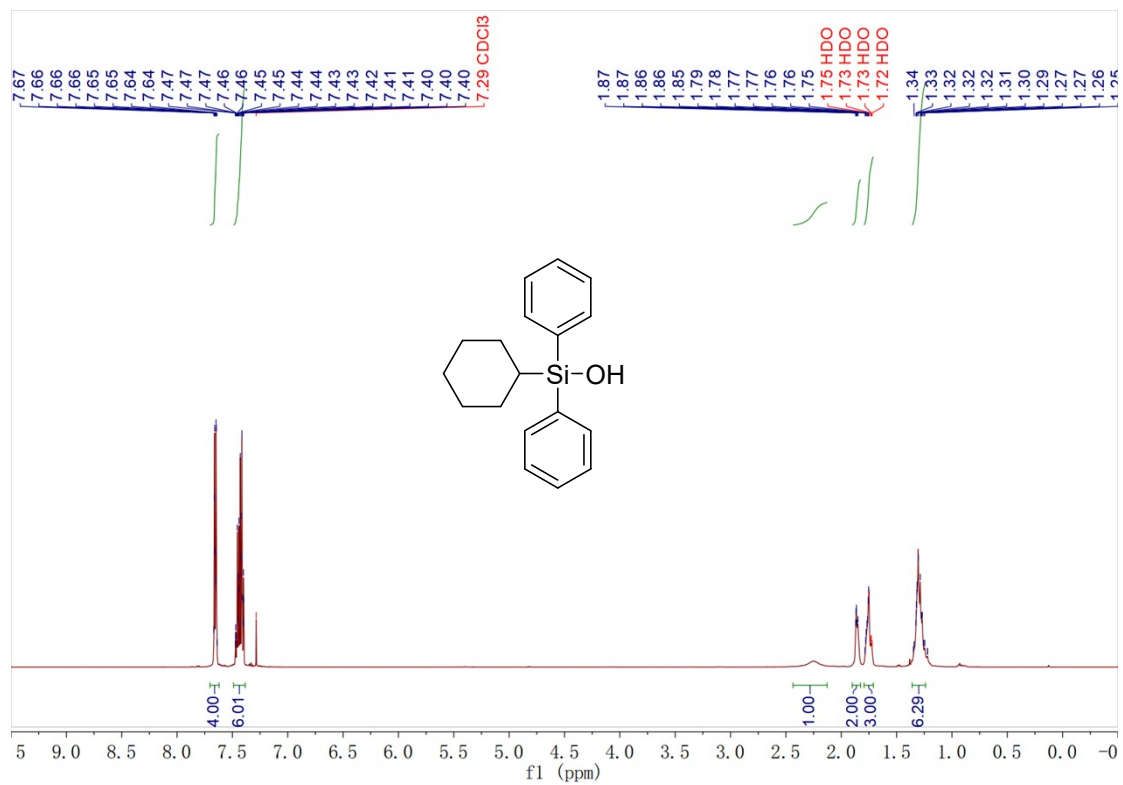

<sup>1</sup>H NMR (500 MHz, CDCl<sub>3</sub>) of **2q**

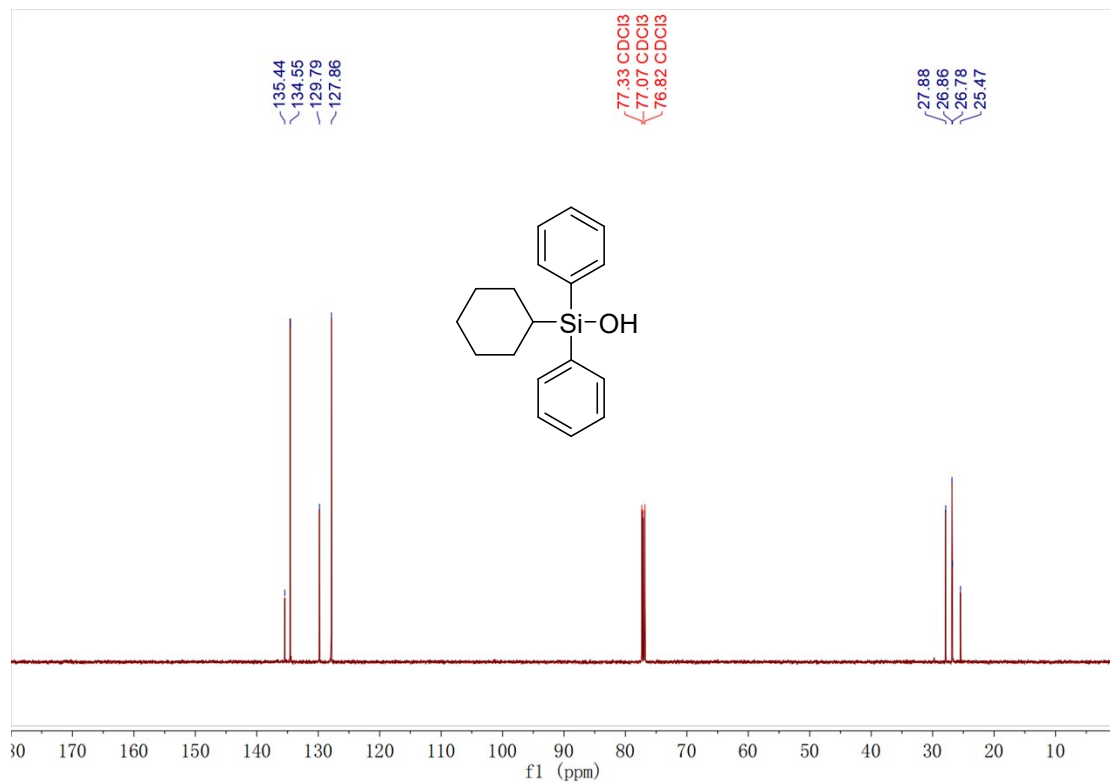

<sup>13</sup>C NMR (126 MHz, CDCl<sub>3</sub>) of **2q**

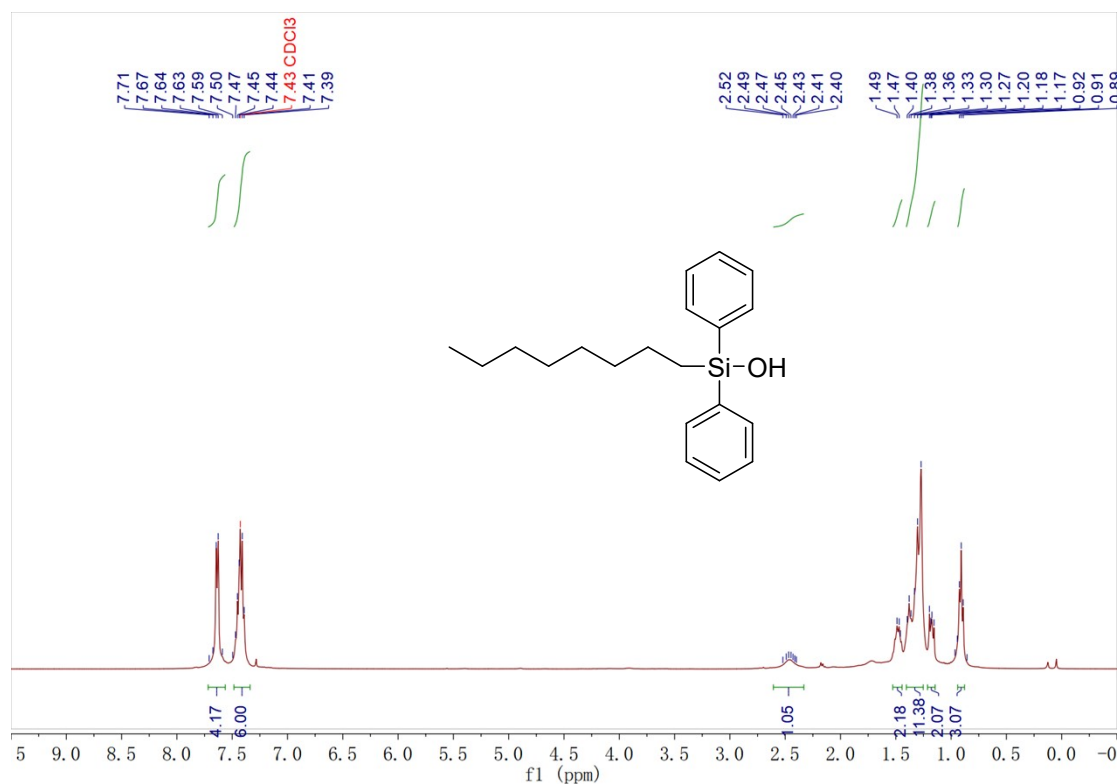

<sup>1</sup>H NMR (400 MHz, CDCl<sub>3</sub>) of **2r**

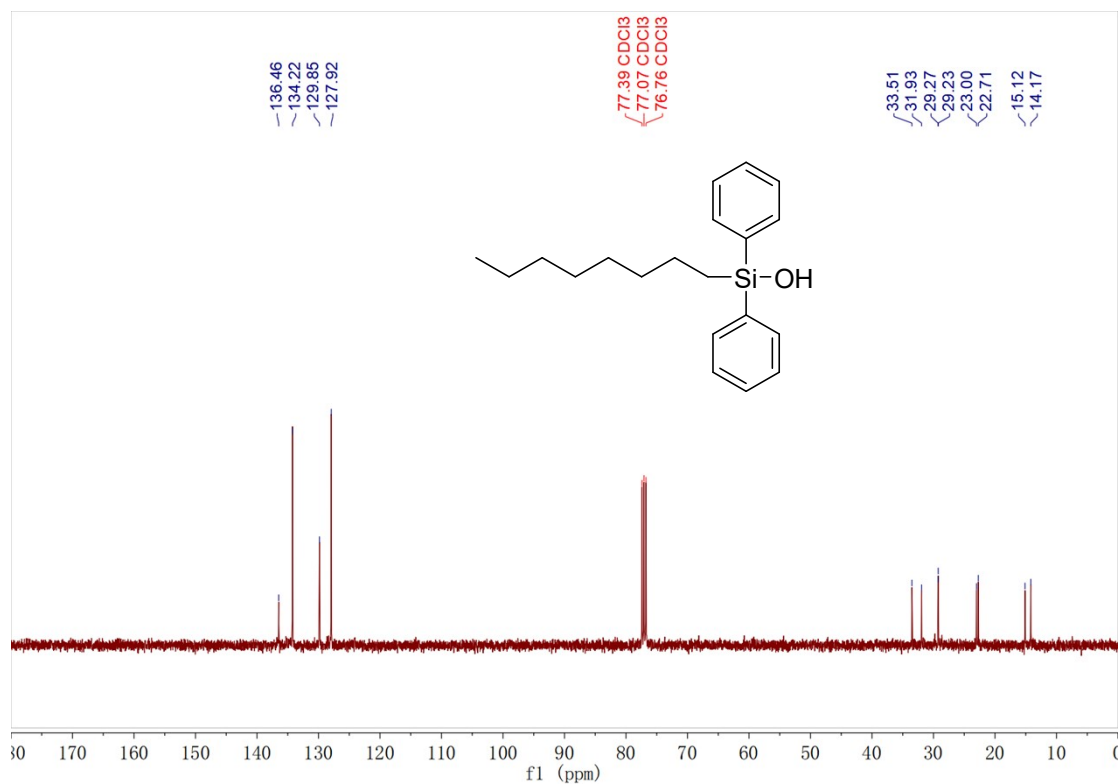

<sup>13</sup>C NMR (100 MHz, CDCl<sub>3</sub>) of **2r**

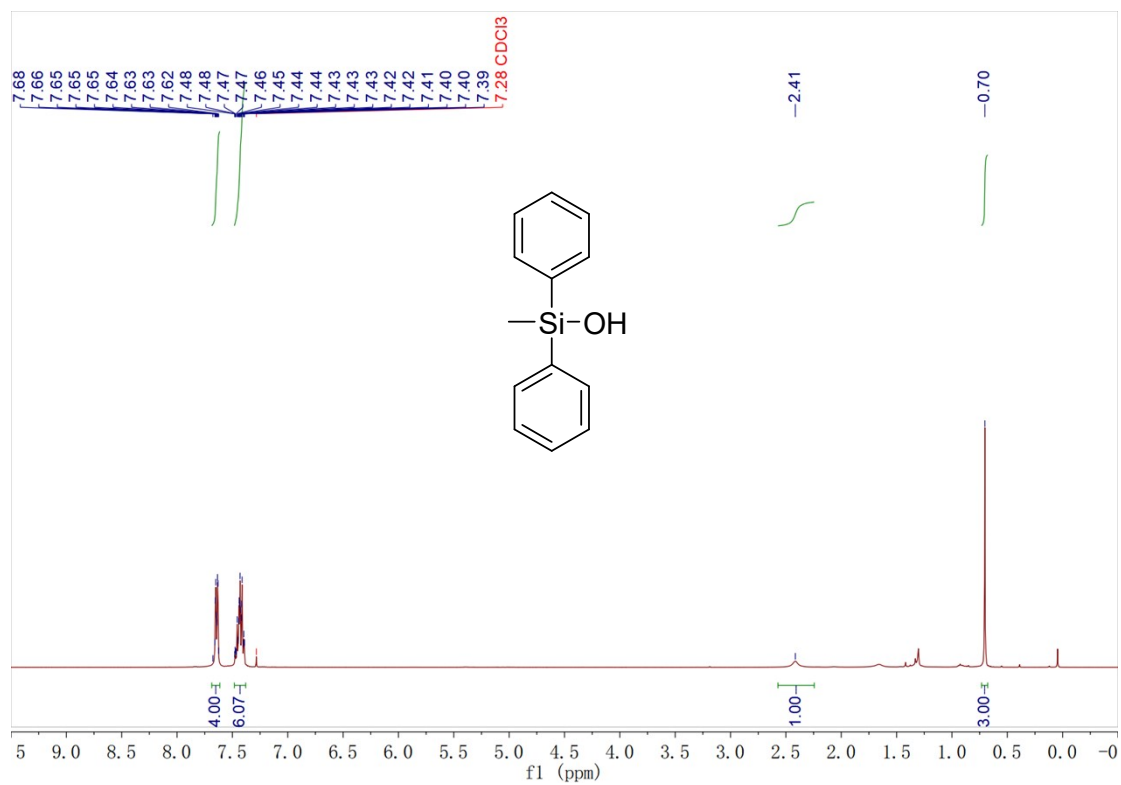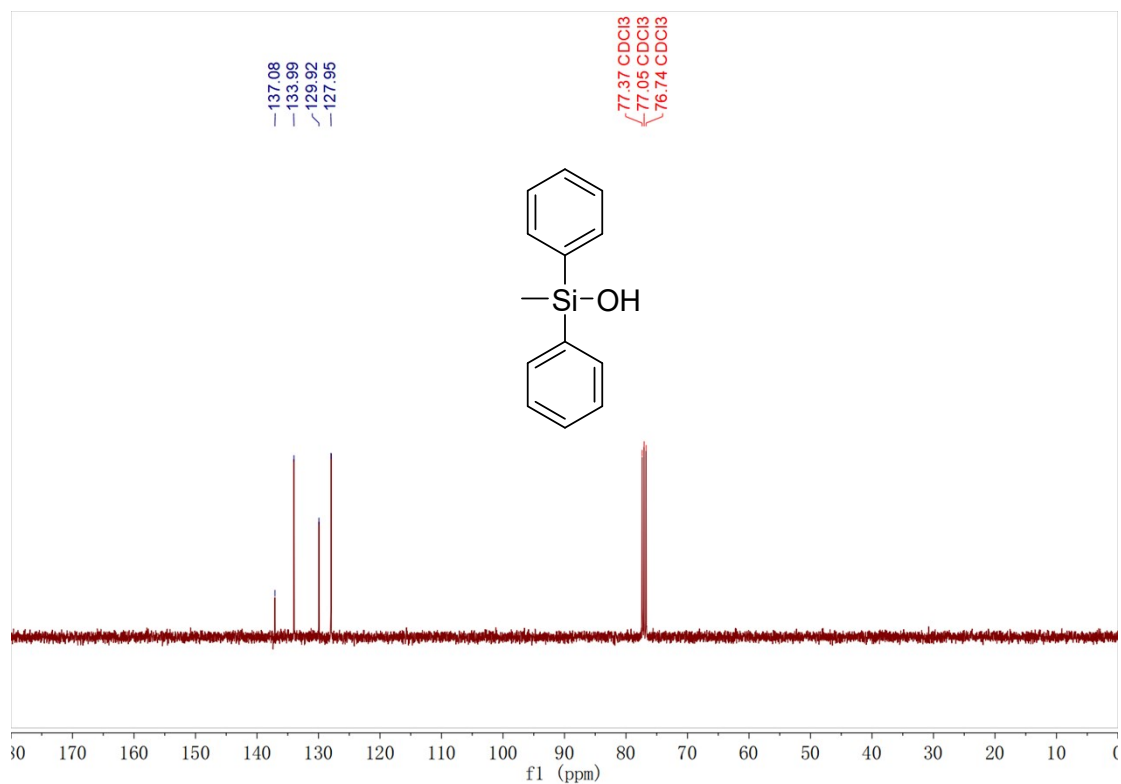

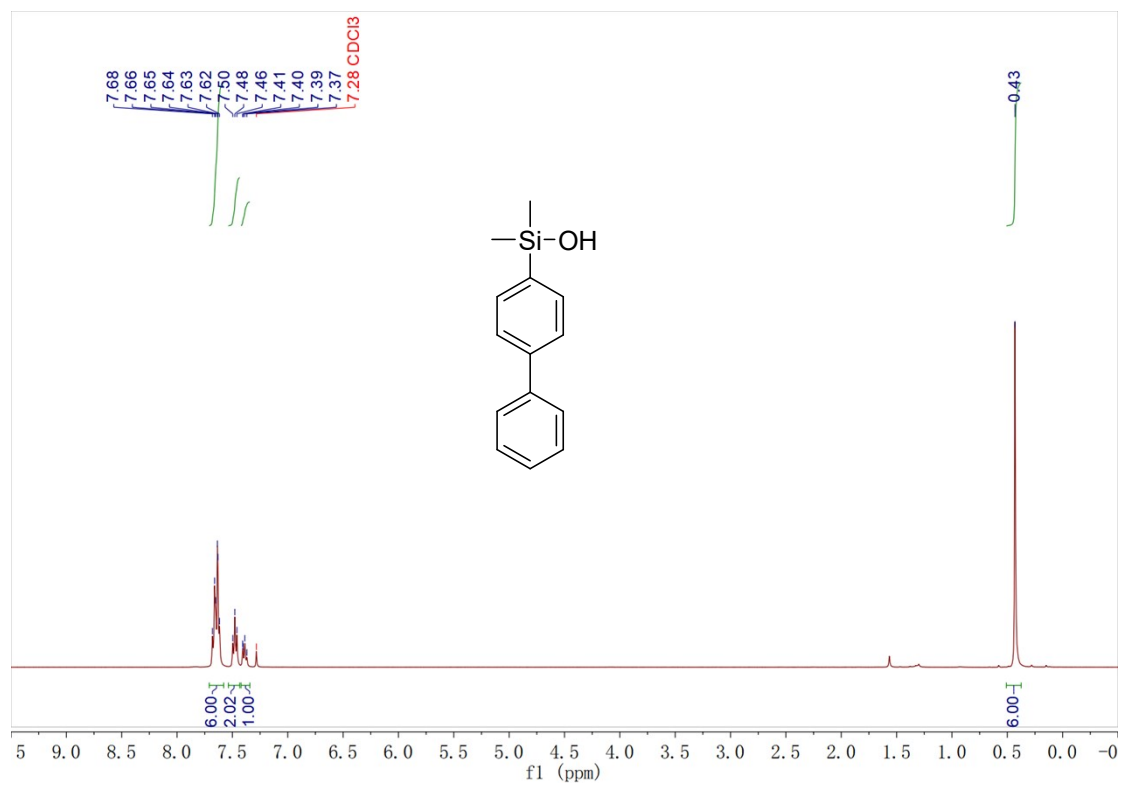

<sup>1</sup>H NMR (400 MHz, CDCl<sub>3</sub>) of **2t**

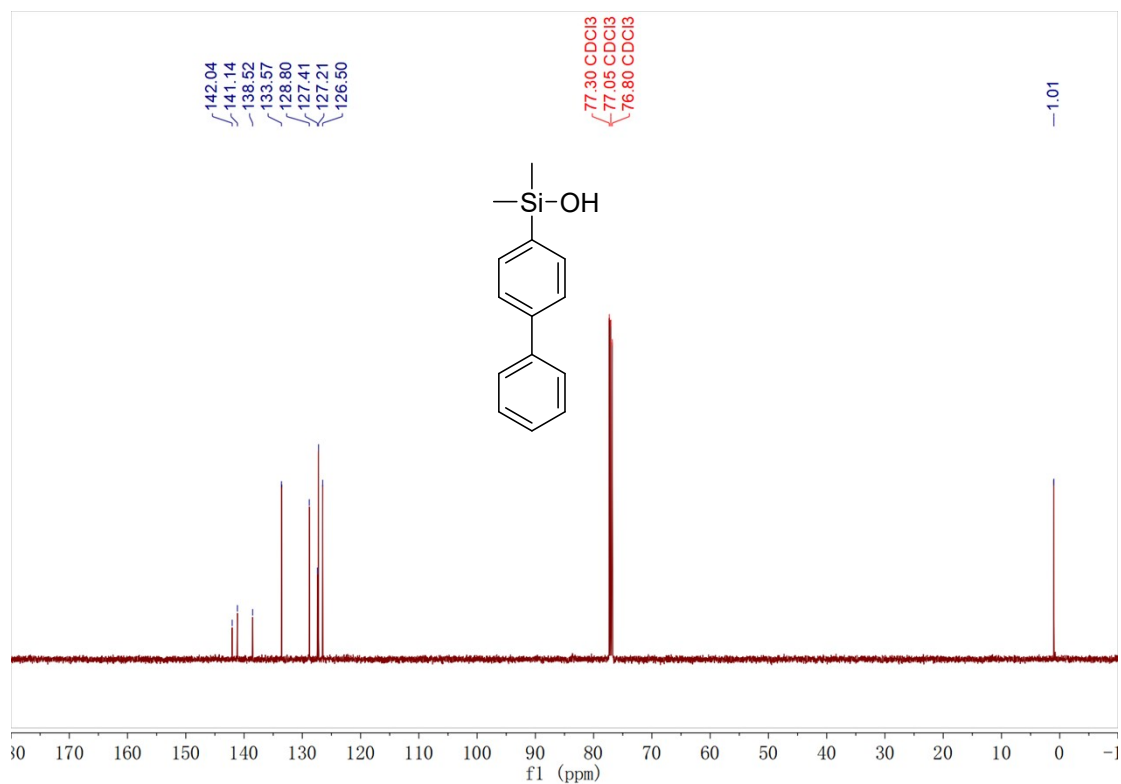

<sup>13</sup>C NMR (126 MHz, CDCl<sub>3</sub>) of **2t**

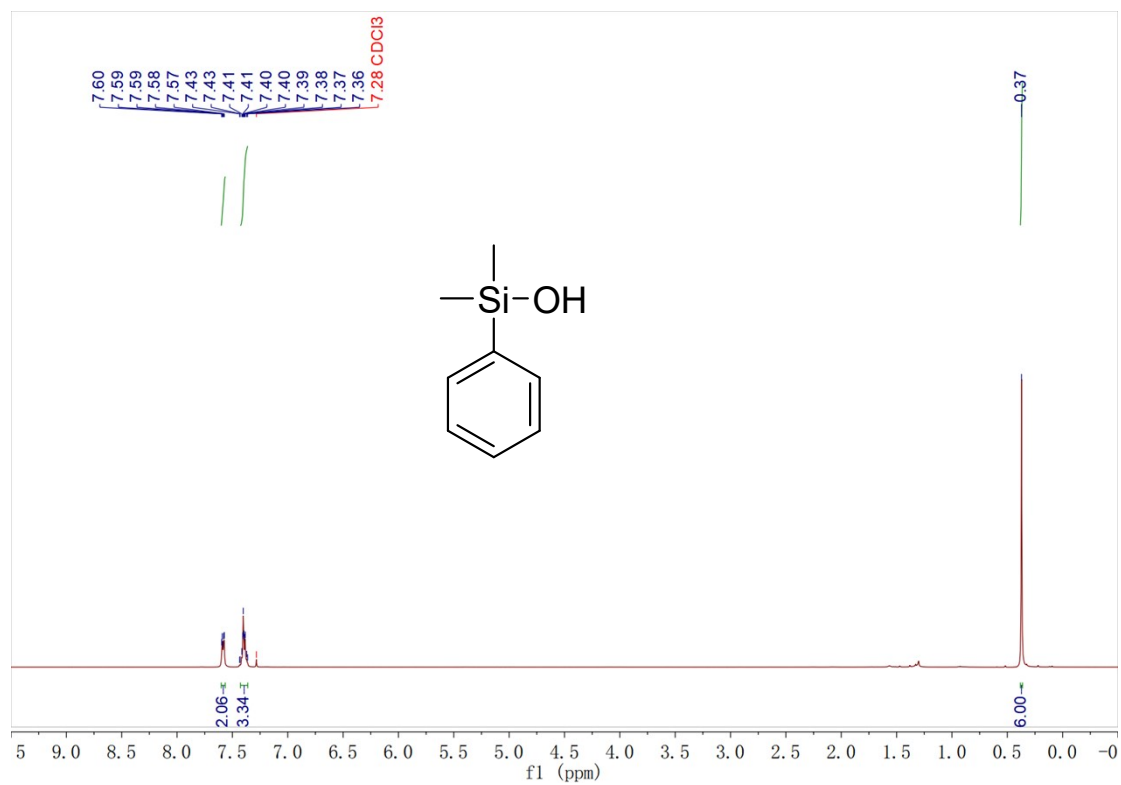

$^1\text{H}$  NMR (400 MHz,  $\text{CDCl}_3$ ) of **2u**

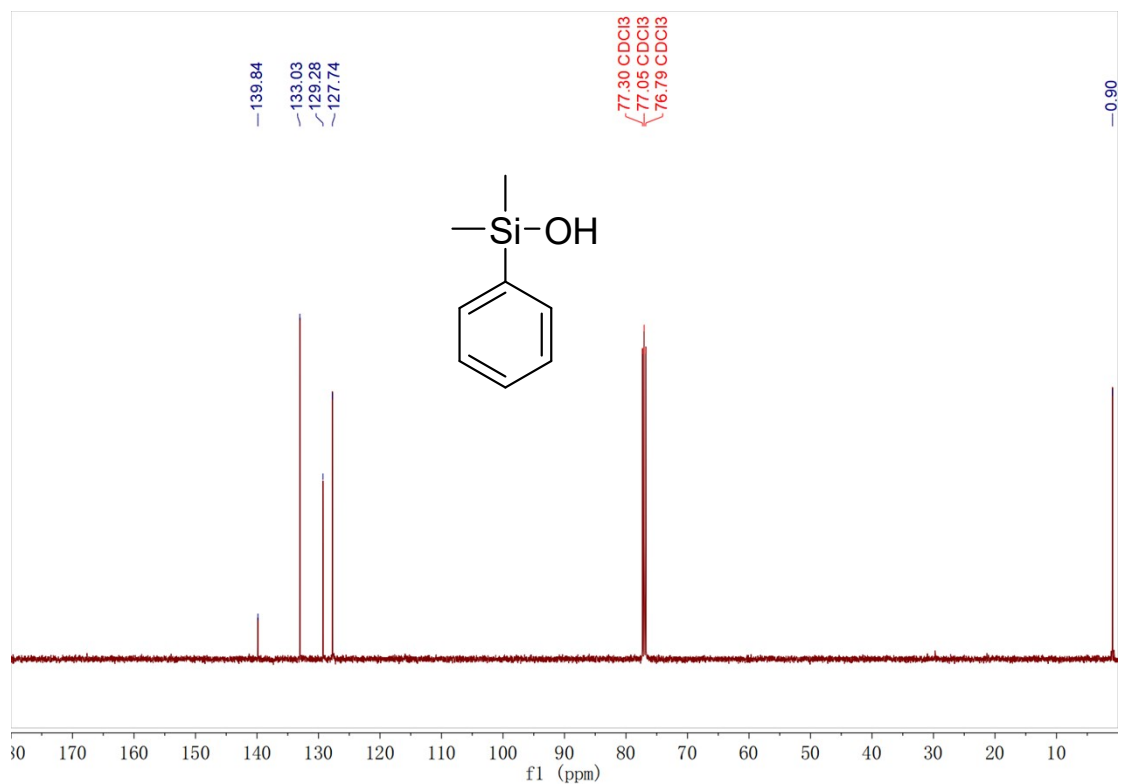

$^{13}\text{C}$  NMR (126 MHz,  $\text{CDCl}_3$ ) of **2u**

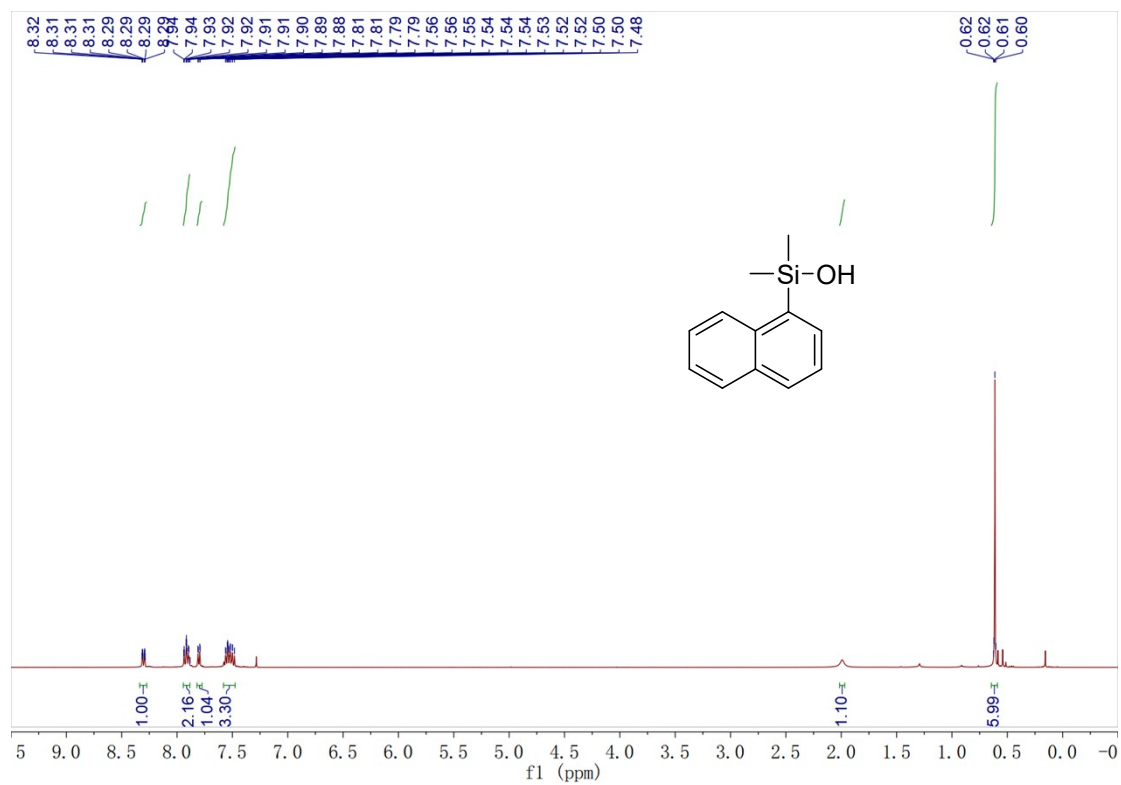

$^1\text{H}$  NMR (400 MHz,  $\text{CDCl}_3$ ) of **2v**

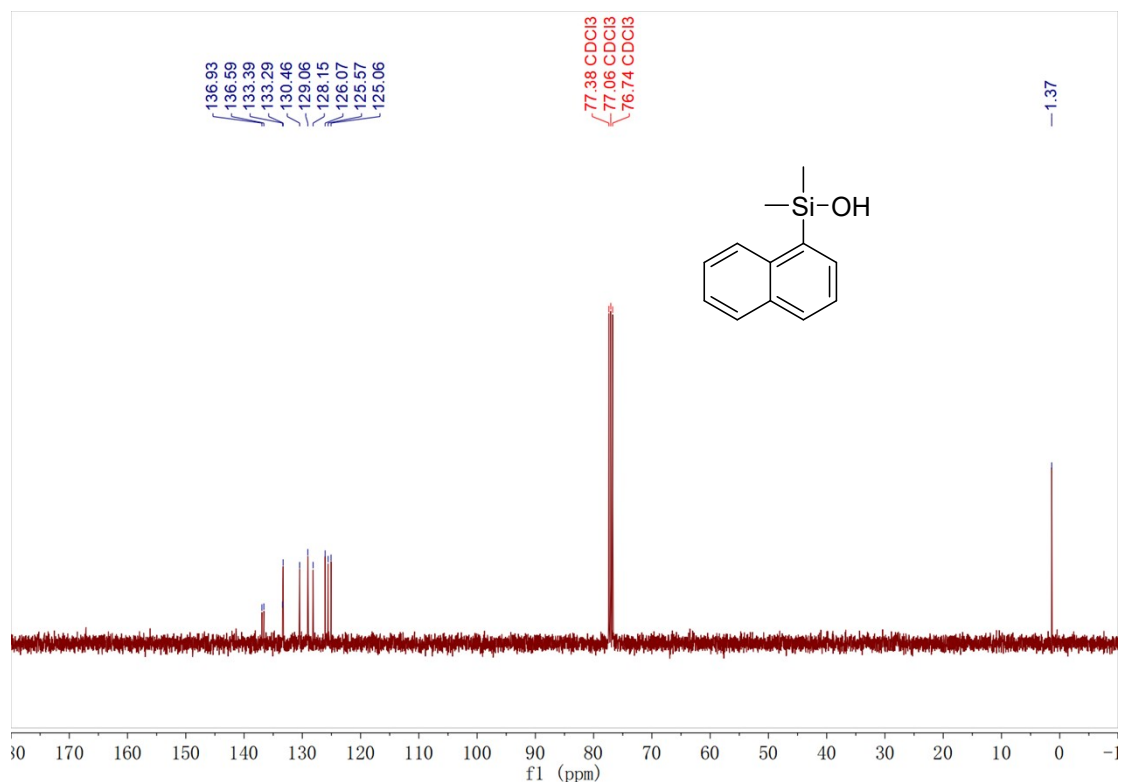

$^{13}\text{C}$  NMR (100 MHz,  $\text{CDCl}_3$ ) of **2v**



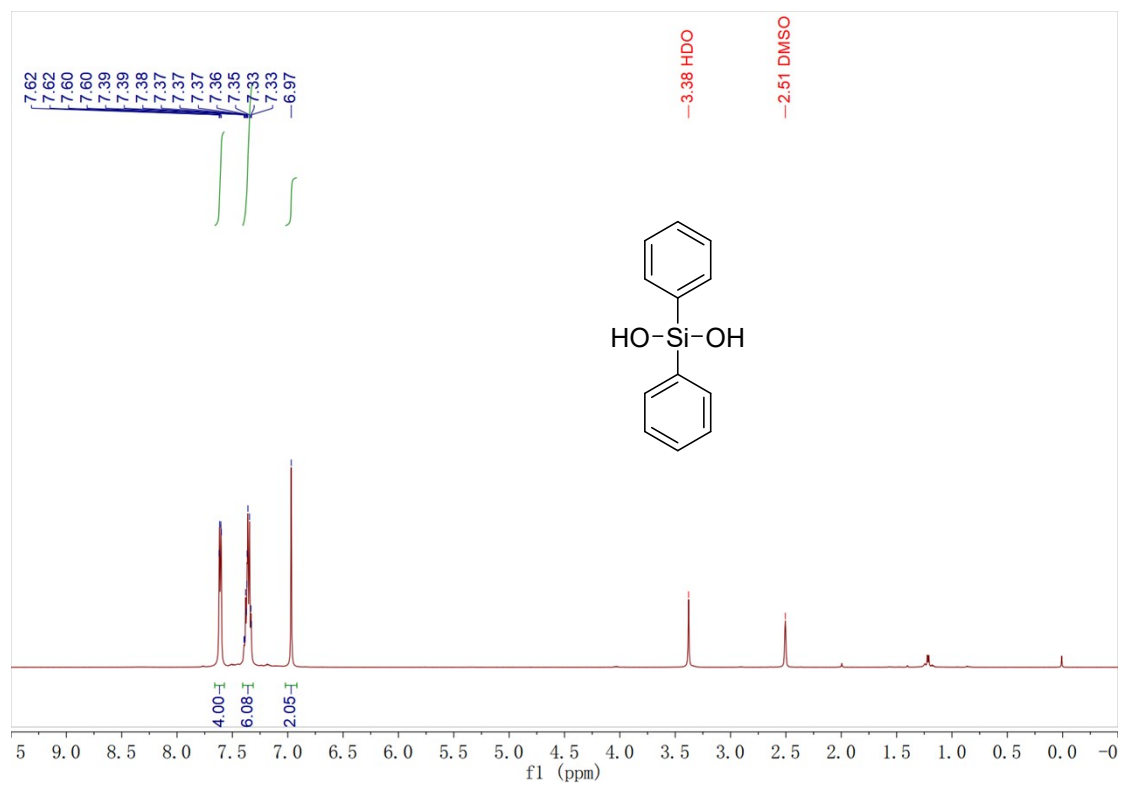

<sup>1</sup>H NMR (500 MHz, DMSO-*d*<sub>6</sub>) of 2x

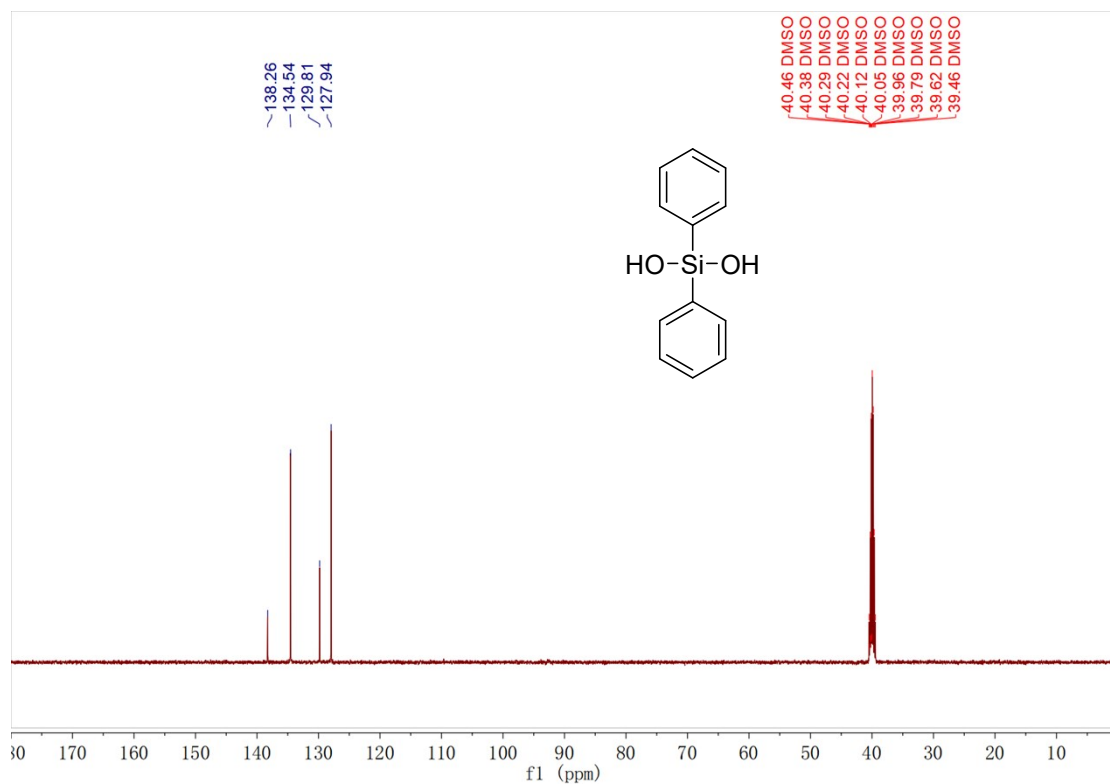

<sup>13</sup>C NMR (126 MHz, DMSO-*d*<sub>6</sub>) of 2x

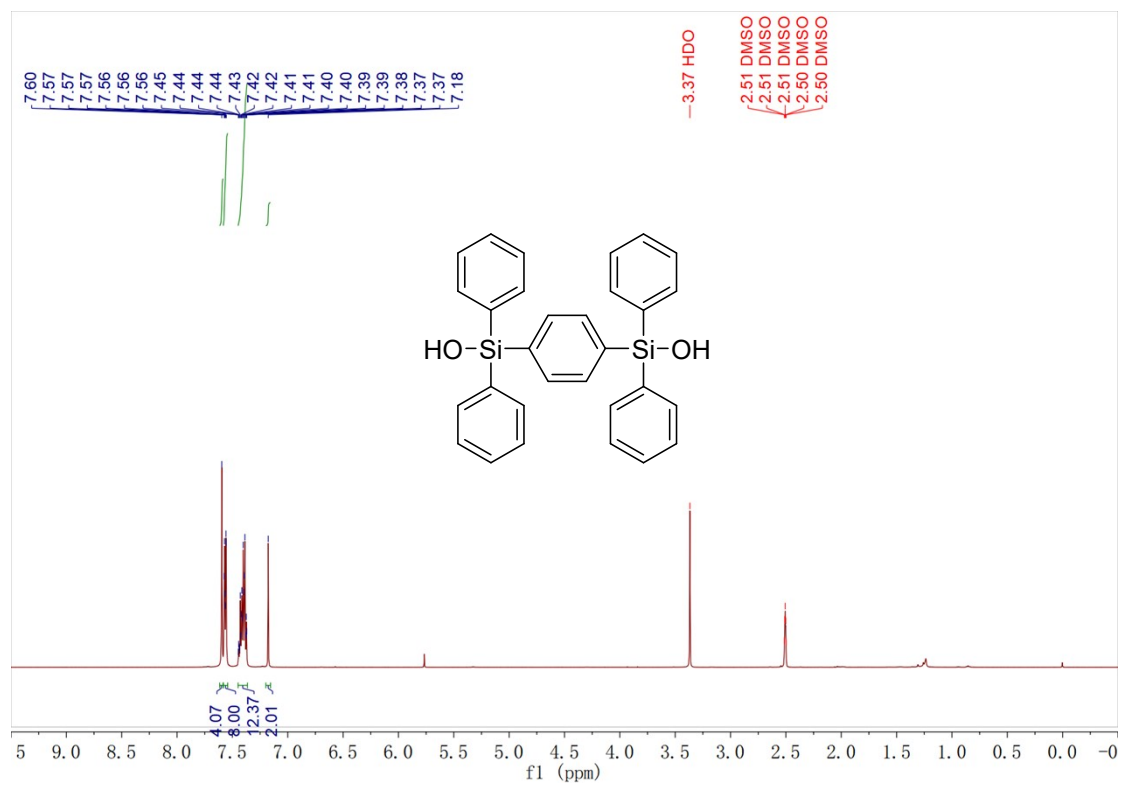

<sup>1</sup>H NMR (500 MHz, DMSO-*d*<sub>6</sub>) of 2y

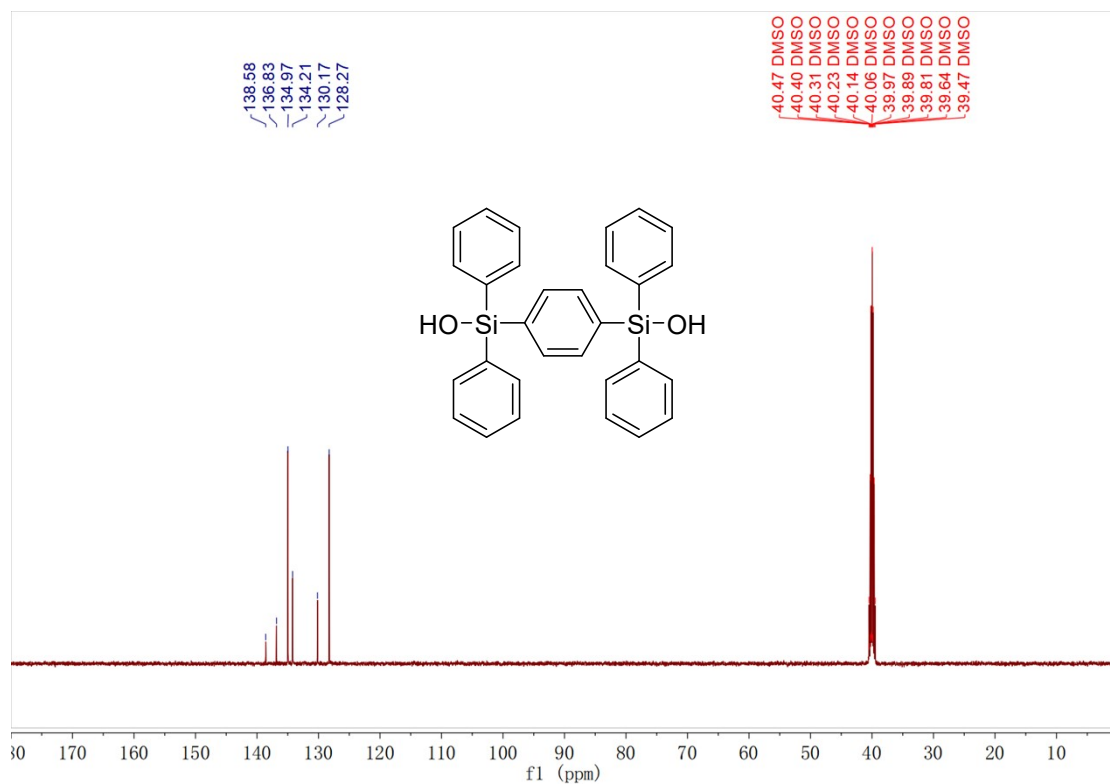

<sup>13</sup>C NMR (126 MHz, DMSO-*d*<sub>6</sub>) of 2y

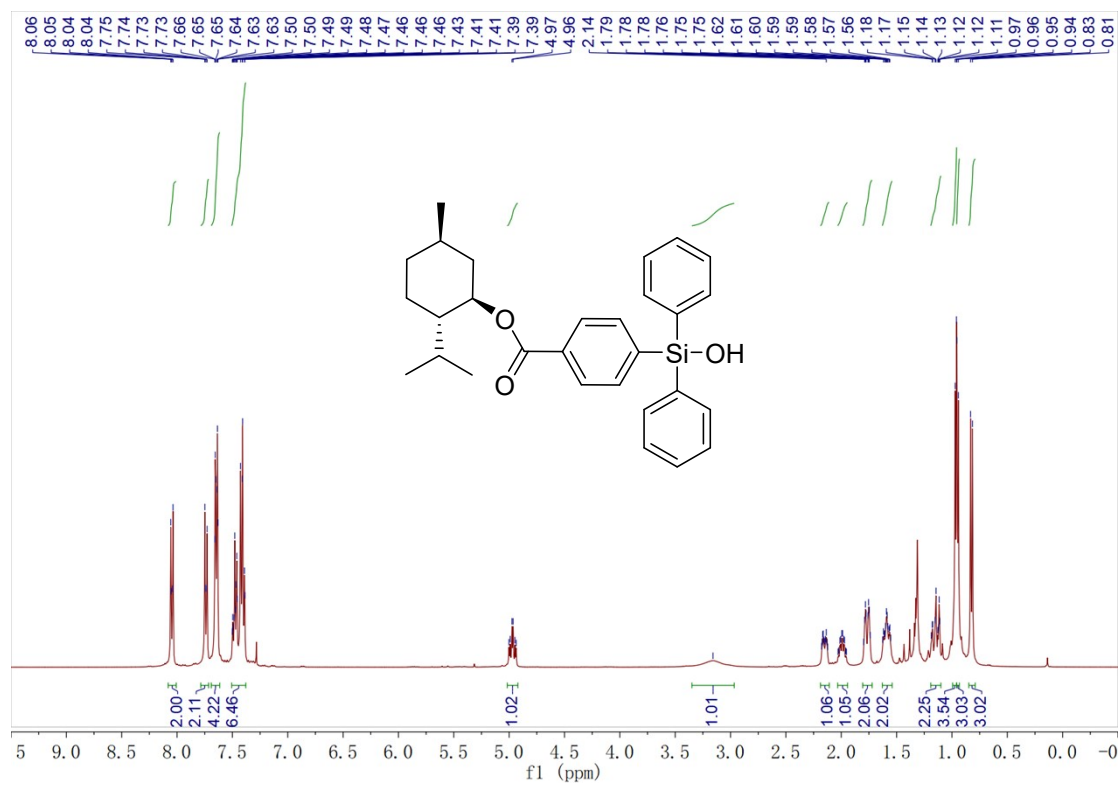

$^1\text{H NMR}$  (400 MHz,  $\text{CDCl}_3$ ) of **2aa**

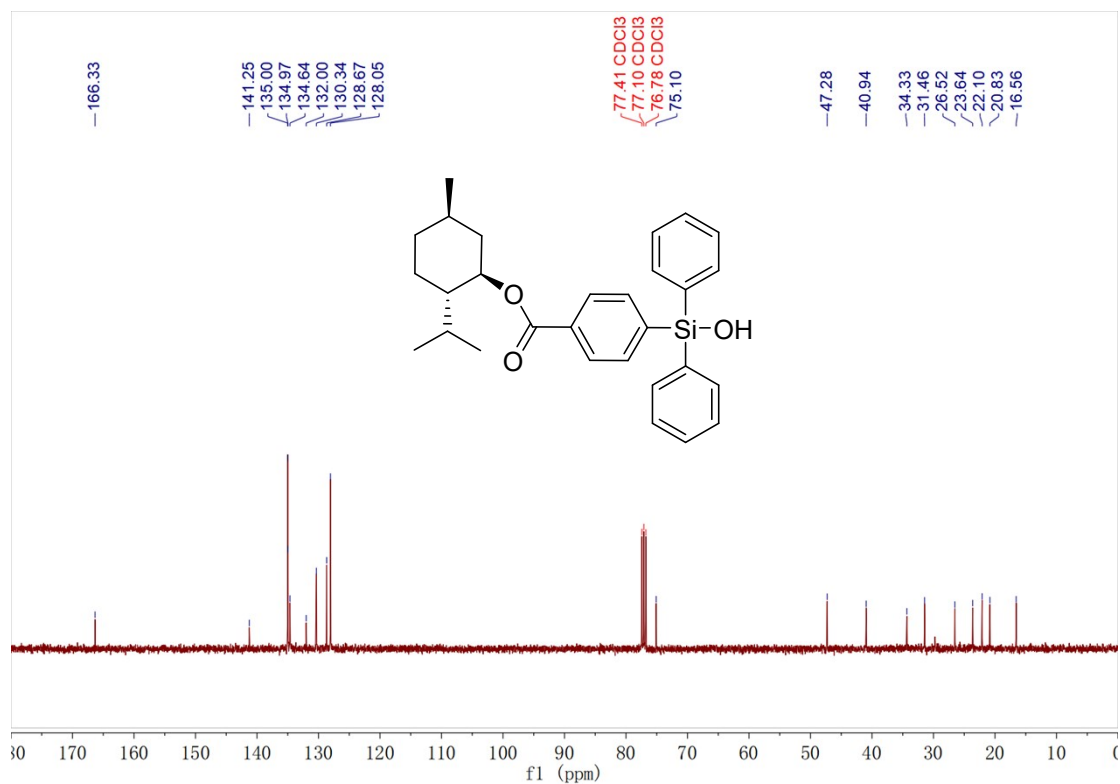

$^{13}\text{C NMR}$  (100 MHz,  $\text{CDCl}_3$ ) of **2aa**

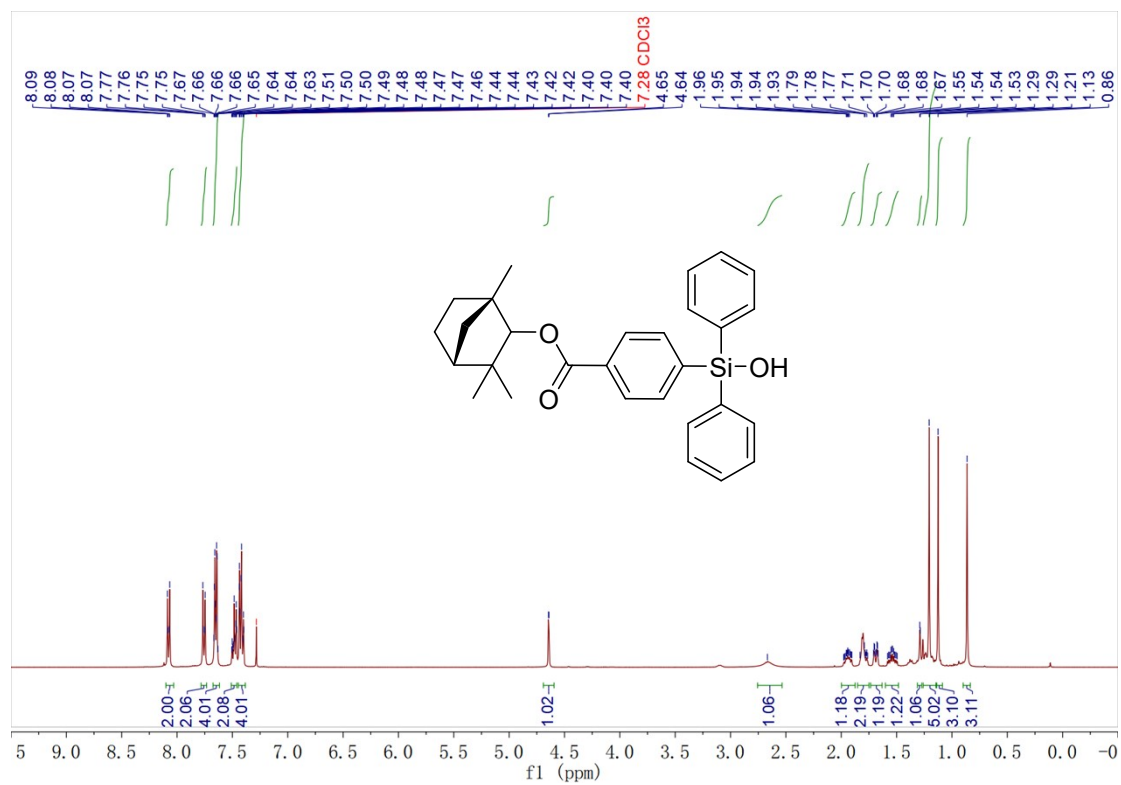

<sup>1</sup>H NMR (400 MHz, CDCl<sub>3</sub>) of 2ab

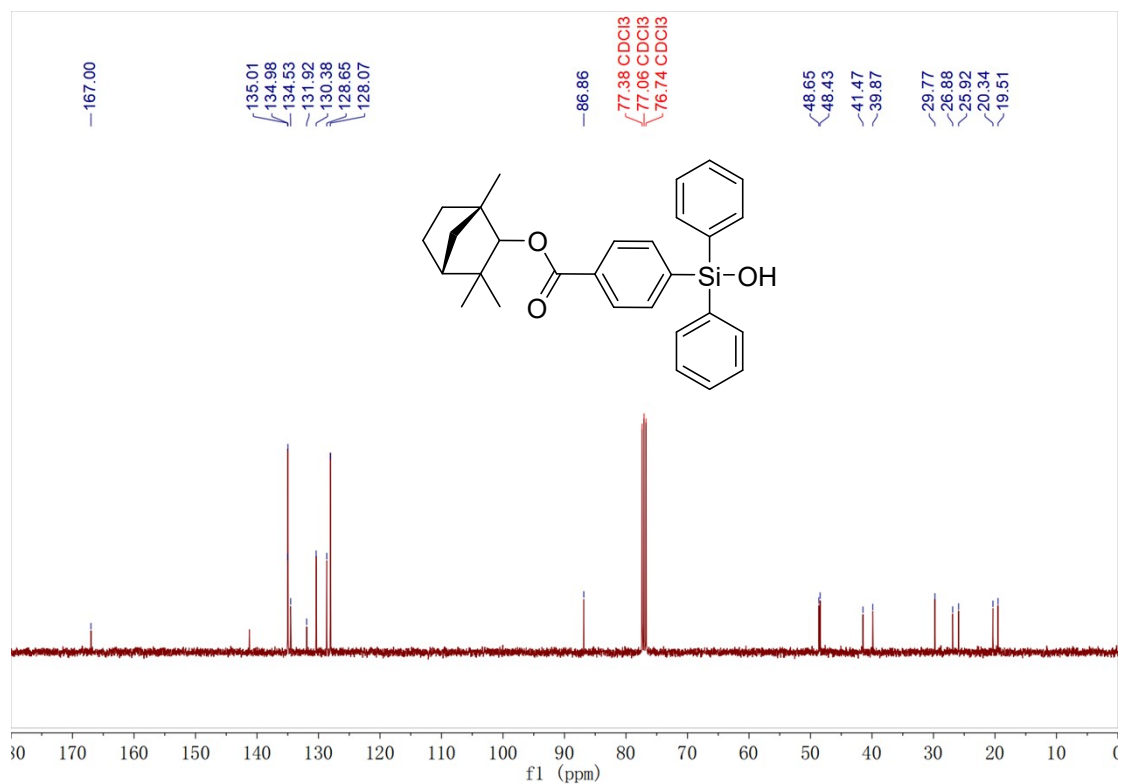

<sup>13</sup>C NMR (100 MHz, CDCl<sub>3</sub>) of 2ab

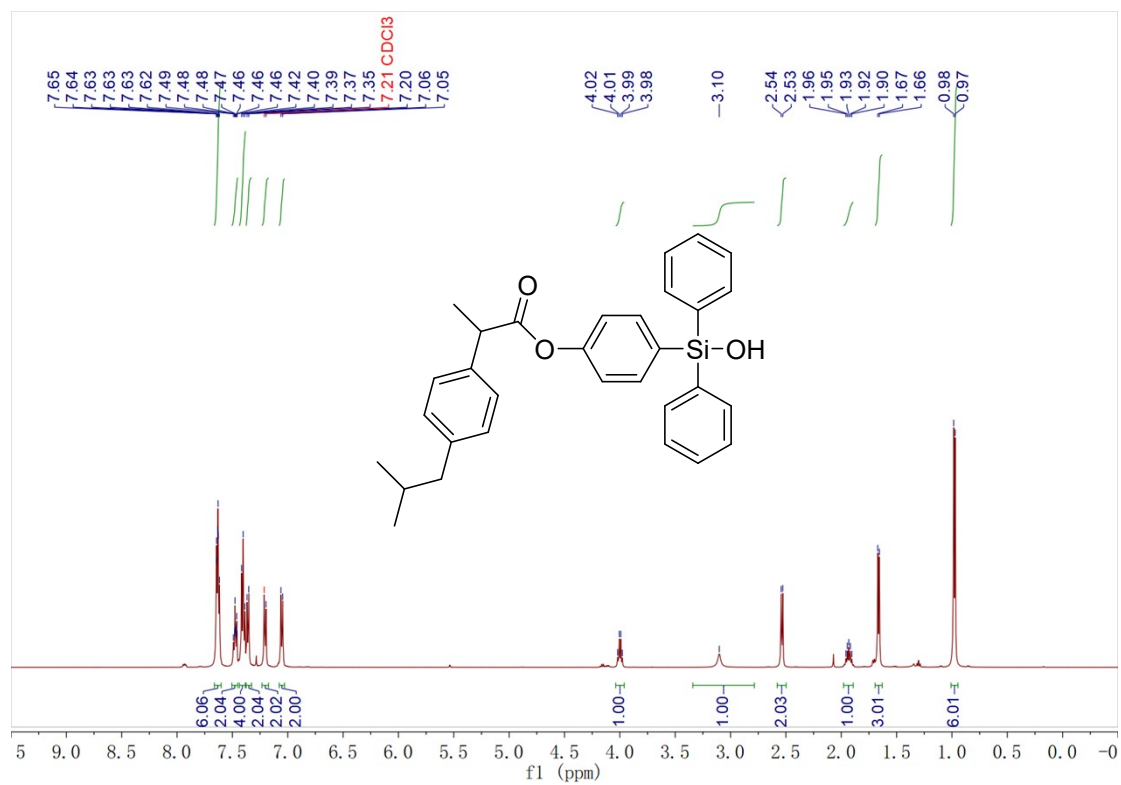

**<sup>1</sup>H NMR (500 MHz, CDCl<sub>3</sub>) of **2ac****

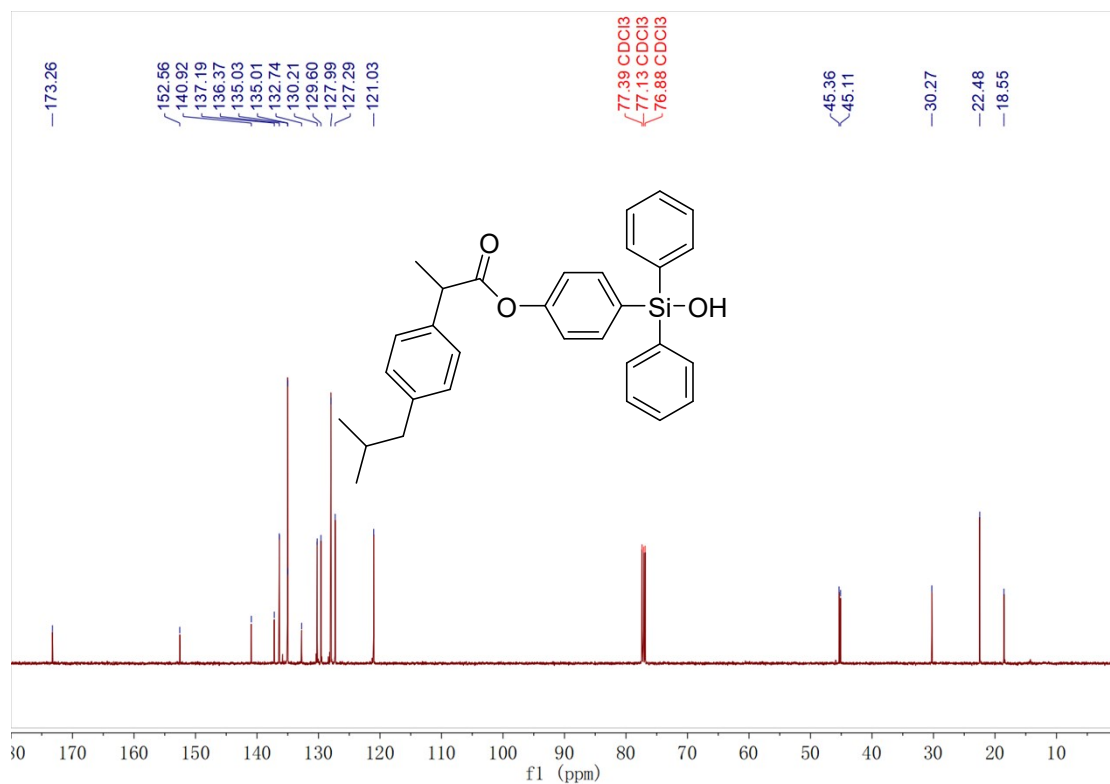

**<sup>13</sup>C NMR (126 MHz, CDCl<sub>3</sub>) of **2ac****
